# Supplementary material for: Mono- and Dimeric Sorbicillinoid Inhibitors Targeting IL-6 and IL-1β from the Mangrove-Derived Fungus Trichoderma reesei BGRg-3
Source: MDPI journal article supplement (doi:10.3390/ijms242216096), 2023-11-08
Supplement: s1 [file s1]

# **Mono- and Dimeric Sorbicillinoid Inhibitors**

## **Targeting the IL-6 and IL-1 $\beta$ from the**

### **Mangrove-Derived Fungus *Trichoderma reesei***

### **BGRg-3**

Yufeng Liu<sup>a,1</sup>, Tao Chen<sup>a,1</sup>, Bing Sun<sup>a</sup>, Qi Tan<sup>a</sup>, Hui Ouyang<sup>b</sup>, Bo Wang<sup>a</sup>, Huijuan Yu<sup>b,\*</sup>, Zhigang She<sup>a,\*</sup>

<sup>a</sup> School of Chemistry, Sun Yat-Sen University, Guangzhou 510275, China; liuyf76@mail2.sysu.edu.cn (Y.L.); chent296@mail2.sysu.edu.cn (T.C.); sunb33@mail.sysu.edu.cn (B.S.); tanq27@mail2.sysu.edu.cn (Q.T.); ouyh0807@gmail.com (H.O.); ceswb@mail.sysu.edu.cn (B.W.)

<sup>b</sup> Guangdong Key Laboratory of Animal Conservation and Resource Utilization, Guangdong Public Laboratory of Wild Animal Conservation and Utilization, Institute of Zoology, Guangdong Academy of Sciences, Guangzhou 510260, China

\* Correspondence: yuhj@giz.gd.cn (H.Y.); cesszhg@mail.sysu.edu.cn (Z.S.)

<sup>1</sup> Authors contributed equally to this work.

## Supporting information

|                                                                                                            |    |
|------------------------------------------------------------------------------------------------------------|----|
| <b>Fig.S1.</b> HRESIMS spectrum of compound <b>1</b> .....                                                 | 4  |
| <b>Fig.S2.</b> $^1\text{H}$ NMR spectrum of compound <b>1</b> (600 MHz, $\text{CD}_3\text{OD}$ ) .....     | 4  |
| <b>Fig.S3.</b> $^{13}\text{C}$ NMR spectrum of compound <b>1</b> (600 MHz, $\text{CD}_3\text{OD}$ ) .....  | 5  |
| <b>Fig.S4.</b> DEPT135 spectrum of compound <b>1</b> (400 MHz, $\text{CD}_3\text{OD}$ ) .....              | 5  |
| <b>Fig.S5.</b> HSQC spectrum of compound <b>1</b> ( $\text{CD}_3\text{OD}$ ) .....                         | 6  |
| <b>Fig.S6.</b> H,H-COSY spectrum of compound <b>1</b> ( $\text{CD}_3\text{OD}$ ) .....                     | 6  |
| <b>Fig.S7.</b> HMBC spectrum of compound <b>1</b> ( $\text{CD}_3\text{OD}$ ) .....                         | 7  |
| <b>Fig.S8.</b> NOE spectrum of compound <b>1</b> ( $\text{CD}_3\text{OD}$ ) .....                          | 7  |
| <b>Fig.S9.</b> HRESIMS spectrum of compound <b>2</b> .....                                                 | 8  |
| <b>Fig.S10.</b> $^1\text{H}$ NMR spectrum of compound <b>2</b> (400 MHz, $\text{CD}_3\text{OD}$ ) .....    | 8  |
| <b>Fig.S11.</b> $^{13}\text{C}$ NMR spectrum of compound <b>2</b> (400 MHz, $\text{CD}_3\text{OD}$ ) ..... | 9  |
| <b>Fig.S12.</b> DEPT135 spectrum of compound <b>2</b> (400 MHz, $\text{CD}_3\text{OD}$ ) .....             | 10 |
| <b>Fig.S13.</b> HSQC spectrum of compound <b>2</b> ( $\text{CD}_3\text{OD}$ ) .....                        | 10 |
| <b>Fig.S14.</b> H,H-COSY spectrum of compound <b>2</b> ( $\text{CD}_3\text{OD}$ ) .....                    | 10 |
| <b>Fig.S15.</b> HMBC spectrum of compound <b>2</b> ( $\text{CD}_3\text{OD}$ ) .....                        | 11 |
| <b>Fig.S16.</b> NOE spectrum of compound <b>2</b> ( $\text{CD}_3\text{OD}$ ) .....                         | 11 |
| <b>Fig.S17.</b> HRESIMS spectrum of compound <b>3</b> .....                                                | 12 |
| <b>Fig.S18.</b> $^1\text{H}$ NMR spectrum of compound <b>3</b> (400 MHz, $\text{CDCl}_3$ ) .....           | 12 |
| <b>Fig.S19.</b> $^{13}\text{C}$ NMR spectrum of compound <b>3</b> (400 MHz, $\text{CDCl}_3$ ) .....        | 13 |
| <b>Fig.S20.</b> DEPT135 spectrum of compound <b>3</b> (400 MHz, $\text{CDCl}_3$ ) .....                    | 13 |
| <b>Fig.S21.</b> HSQC spectrum of compound <b>3</b> ( $\text{CDCl}_3$ ) .....                               | 14 |
| <b>Fig.S22.</b> H,H-COSY spectrum of compound <b>3</b> ( $\text{CDCl}_3$ ) .....                           | 14 |
| <b>Fig.S23.</b> HMBC spectrum of compound <b>3</b> ( $\text{CDCl}_3$ ) .....                               | 15 |
| <b>Fig.S24.</b> NOE spectrum of compound <b>3</b> ( $\text{CDCl}_3$ ) .....                                | 15 |
| <b>Fig.S25.</b> HRESIMS spectrum of compound <b>5</b> .....                                                | 16 |
| <b>Fig.S26.</b> $^1\text{H}$ NMR spectrum of compound <b>5</b> (400 MHz, $\text{CDCl}_3$ ) .....           | 16 |
| <b>Fig.S27.</b> $^{13}\text{C}$ NMR spectrum of compound <b>5</b> (400 MHz, $\text{CDCl}_3$ ) .....        | 17 |
| <b>Fig.S28.</b> DEPT135 spectrum of compound <b>5</b> (400 MHz, $\text{CDCl}_3$ ) .....                    | 17 |

|                                                                                   |    |
|-----------------------------------------------------------------------------------|----|
| <b>Fig.S29.</b> HSQC spectrum of compound <b>5</b> (CDCl <sub>3</sub> ) .....     | 18 |
| <b>Fig.S30.</b> H,H-COSY spectrum of compound <b>5</b> (CDCl <sub>3</sub> ) ..... | 18 |
| <b>Fig.S31.</b> HMBC spectrum of compound <b>5</b> (CDCl <sub>3</sub> ) .....     | 19 |
| <b>Fig.S32.</b> NOE spectrum of compound <b>5</b> (CDCl <sub>3</sub> ) .....      | 19 |
| <b>Fig.S33.</b> UV and ECD of compound <b>1</b> (CH <sub>3</sub> OH) .....        | 20 |
| <b>Fig.S34.</b> UV of compound <b>2</b> (CH <sub>3</sub> OH) .....                | 20 |
| <b>Fig.S35.</b> UV and ECD of compound <b>3</b> (CH <sub>3</sub> OH) .....        | 20 |
| <b>Fig.S36.</b> UV and ECD of compound <b>5</b> (CH <sub>3</sub> OH) .....        | 21 |
| <b>Fig.S37.</b> Isolation procedure .....                                         | 21 |
| <i>Biosynthesis pathway</i> .....                                                 | 21 |
| <b>Fig.S38.</b> Biosynthesis pathway of isolated mono-sorbicillinoids .....       | 22 |
| <b>Fig.S39.</b> Biosynthesis pathway of isolated dimeric sorbicillinoids.....     | 23 |
| ECD calculations data of <b>1</b> .....                                           | 23 |
| ECD calculations data of <b>3</b> .....                                           | 29 |
| ECD calculations data of <b>5</b> .....                                           | 43 |
| Reference.....                                                                    | 47 |

BGR-12 #258 RT: 1.15 AV: 1 NL: 1.15E9  
T: FTMS + p ESI Full ms [200.0000-1000.0000]

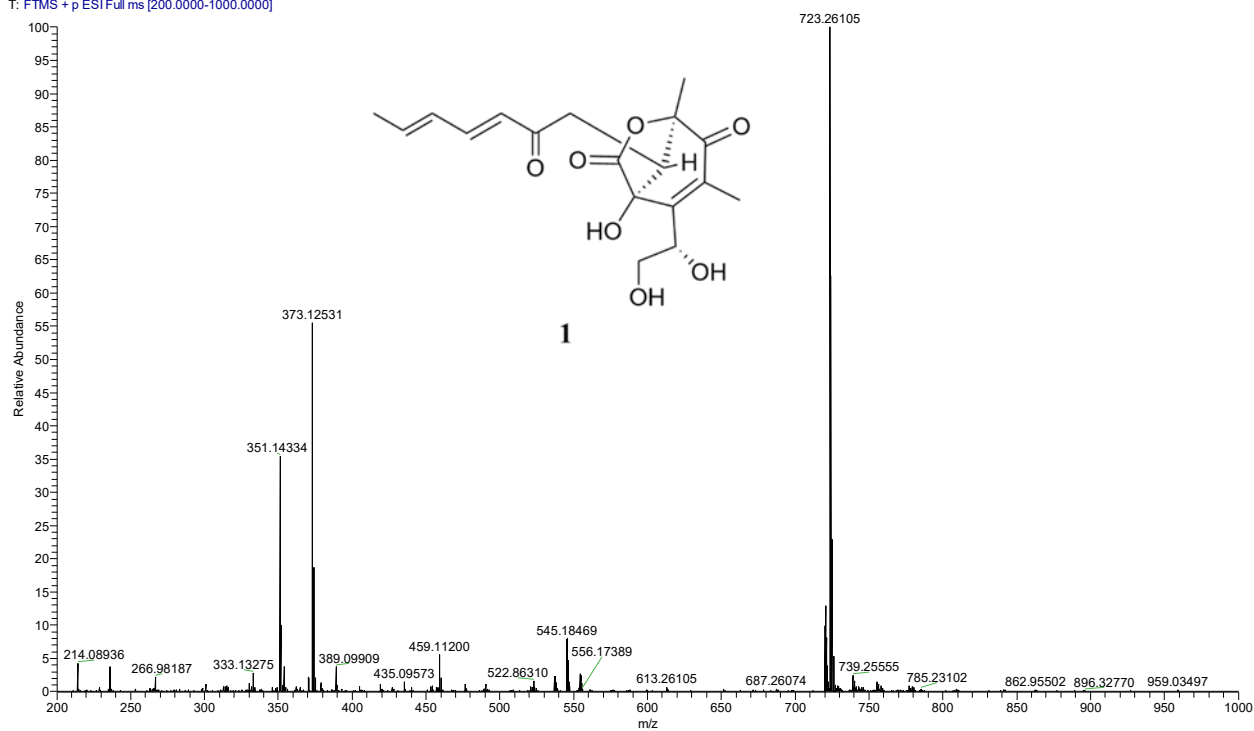

**Fig.S1.** HRESIMS spectrum of compound **1**

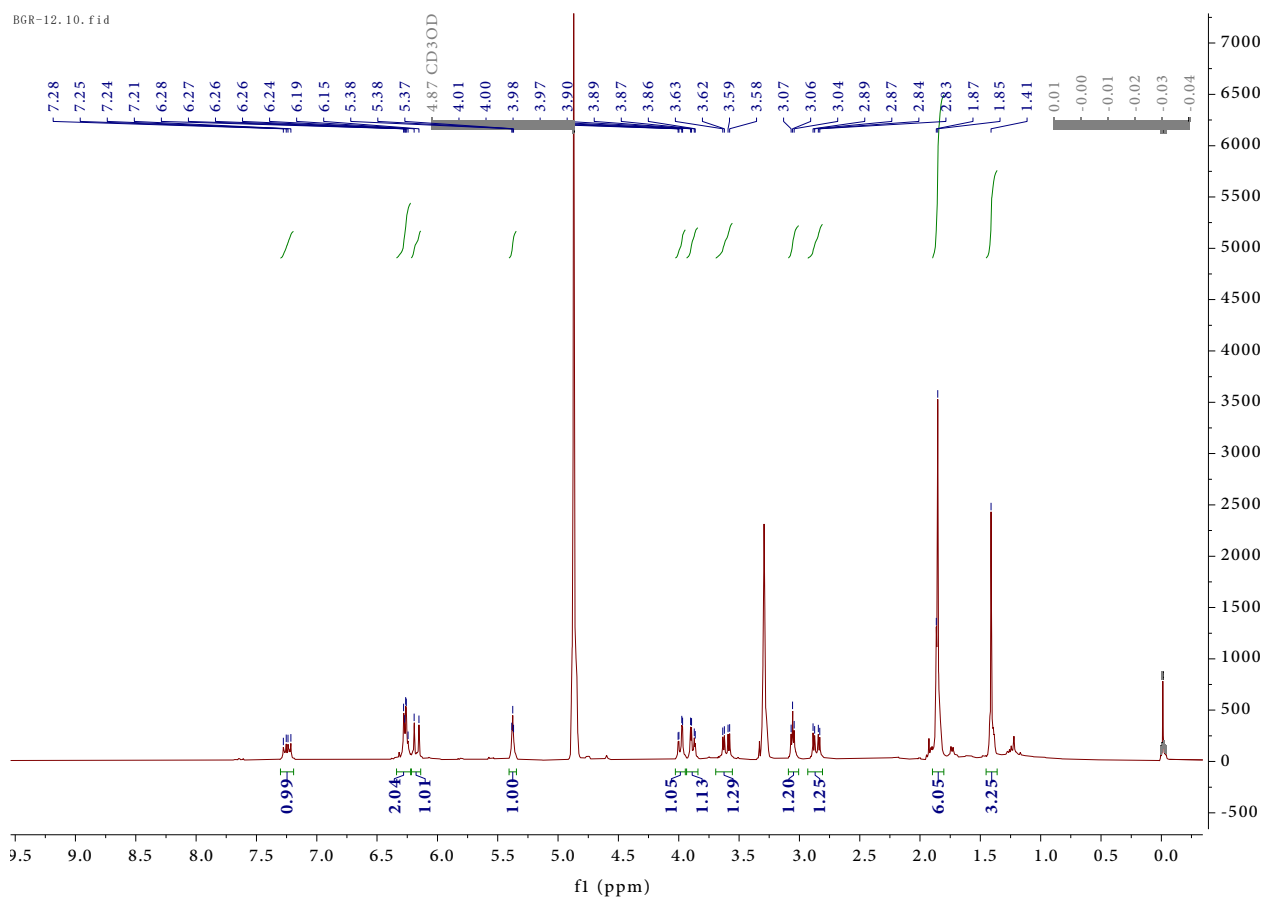

**Fig.S2.**  $^1\text{H}$  NMR spectrum of compound **1** (600 MHz,  $\text{CD}_3\text{OD}$ )

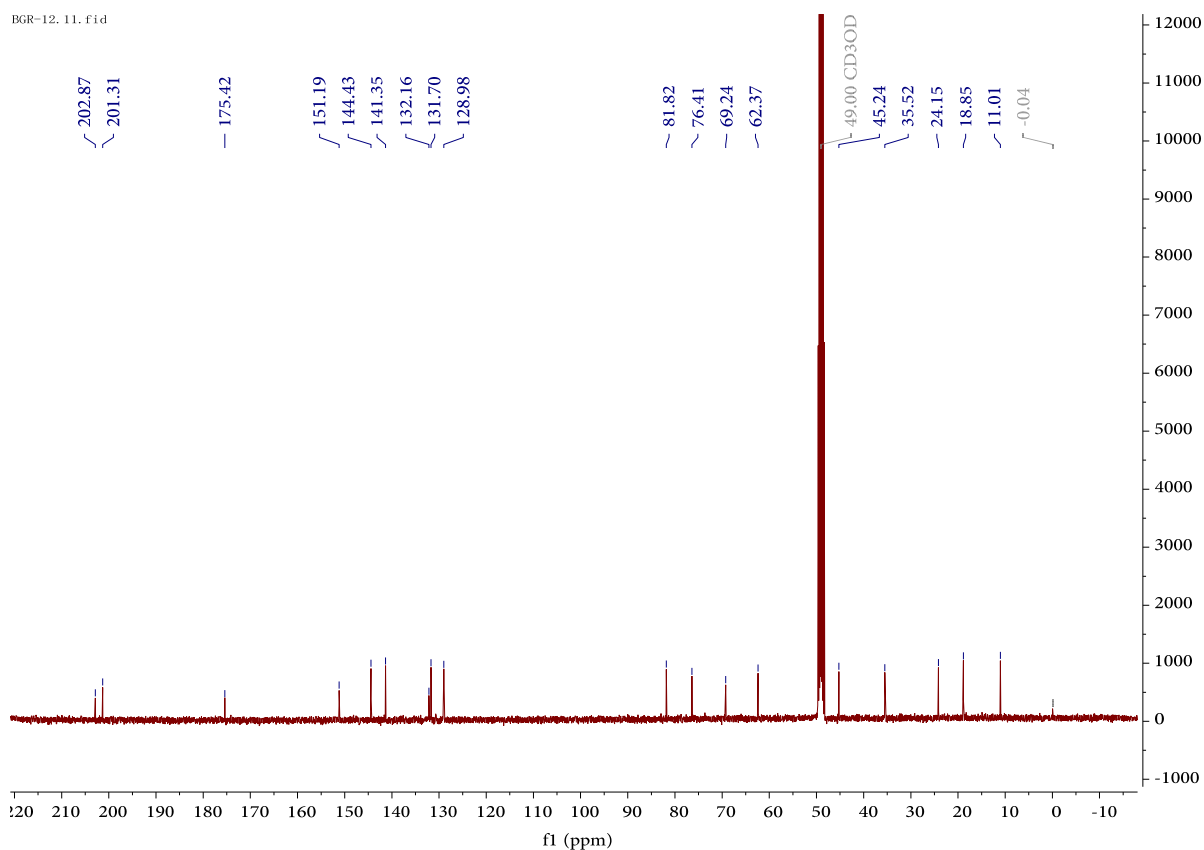

**Fig.S3.**  $^{13}\text{C}$  NMR spectrum of compound **1** (600 MHz,  $\text{CD}_3\text{OD}$  )

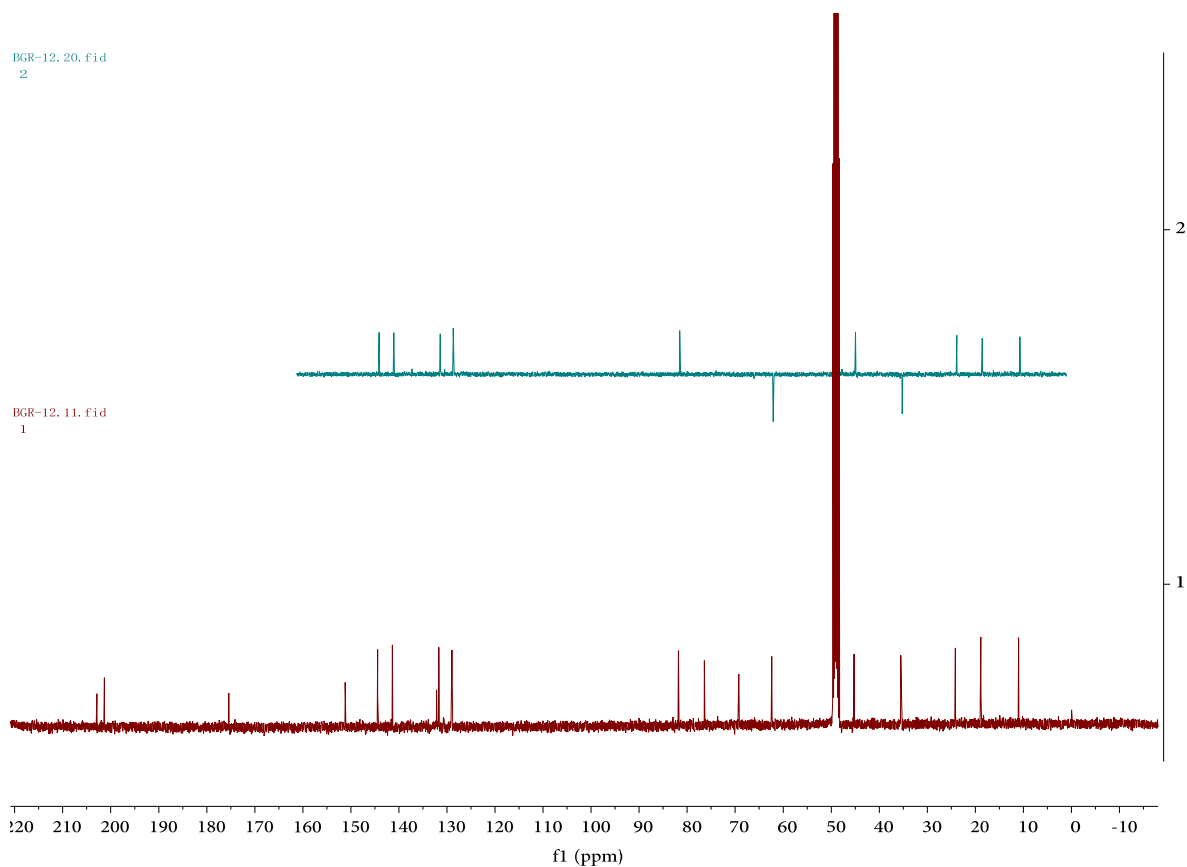

**Fig.S4.** DEPT135 spectrum of compound **1** (400 MHz,  $\text{CD}_3\text{OD}$  )

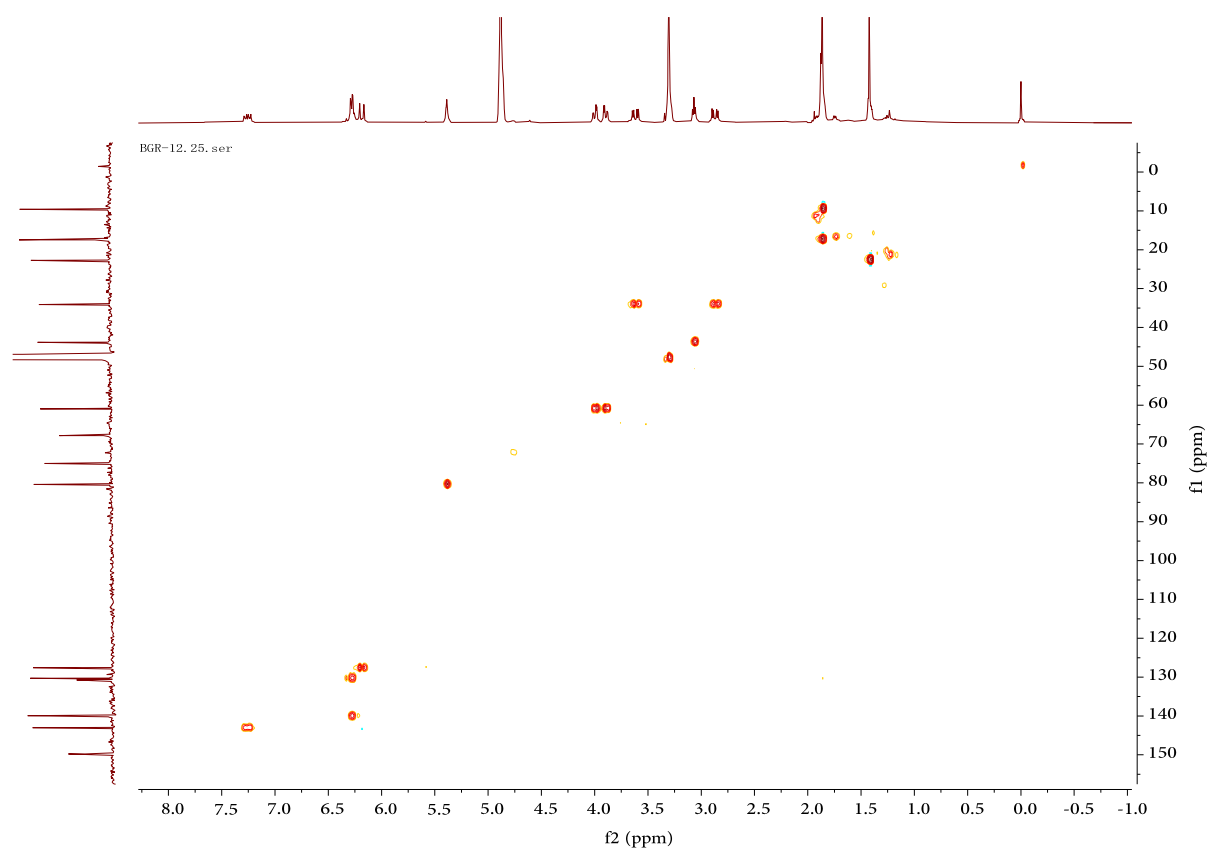

**Fig.S5.** HSQC spectrum of compound **1** (CD<sub>3</sub>OD )

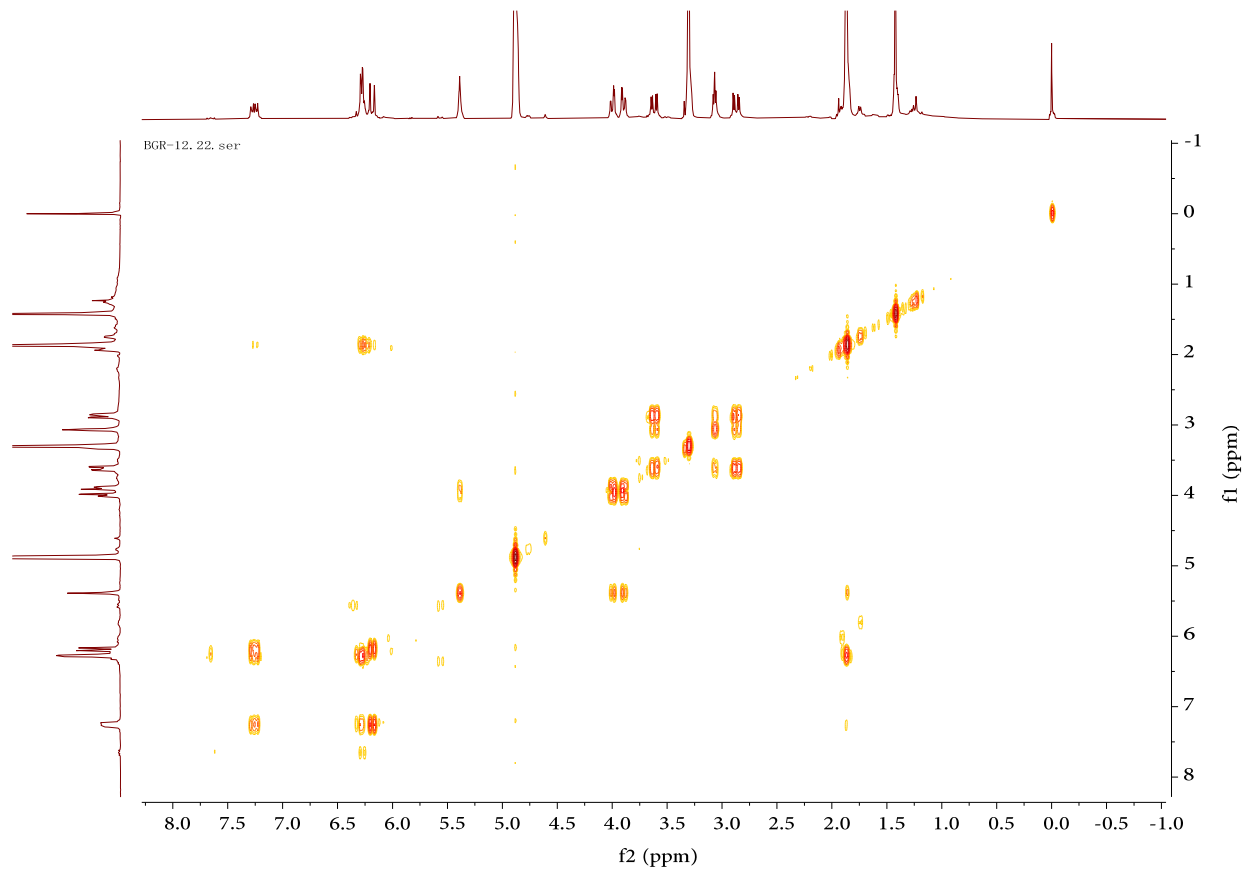

**Fig.S6.** H,H-COSY spectrum of compound **1** (CD<sub>3</sub>OD )

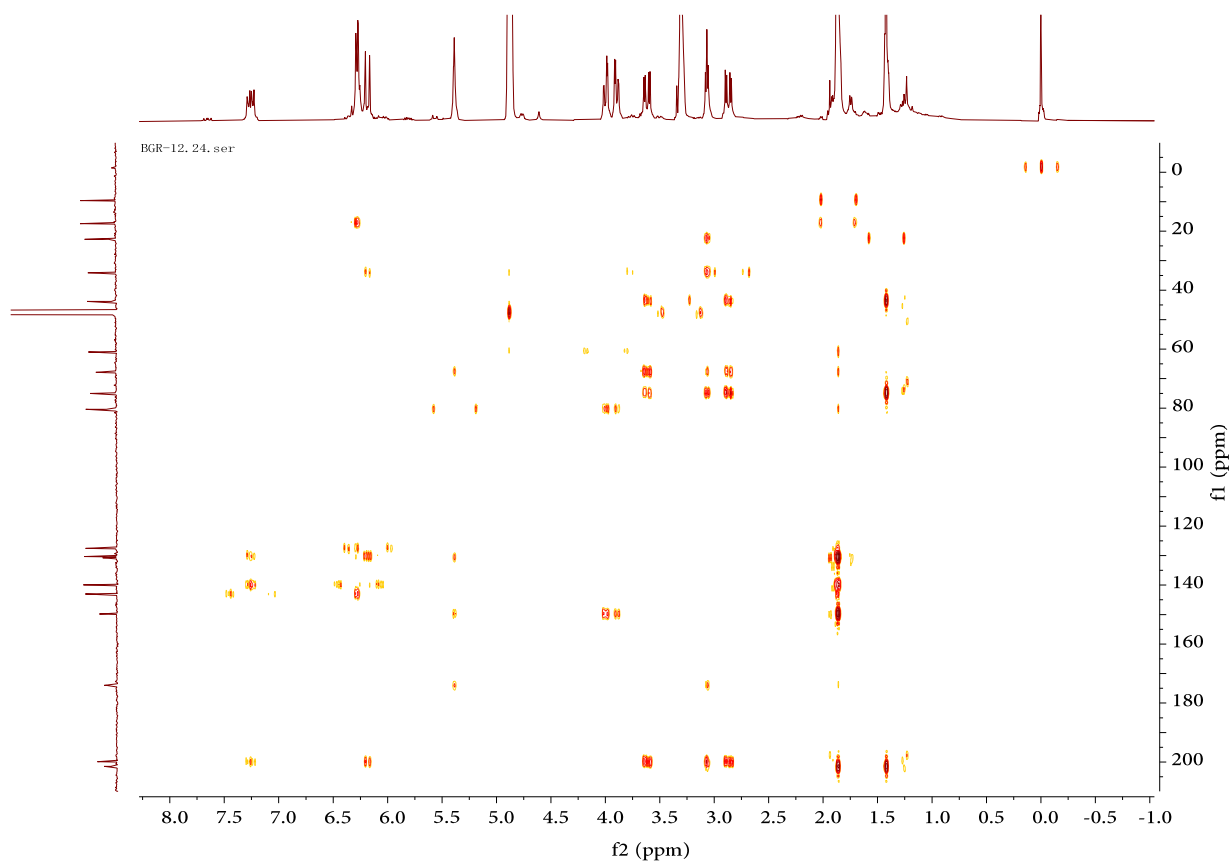

**Fig.S7.** HMBC spectrum of compound **1** (CD<sub>3</sub>OD )

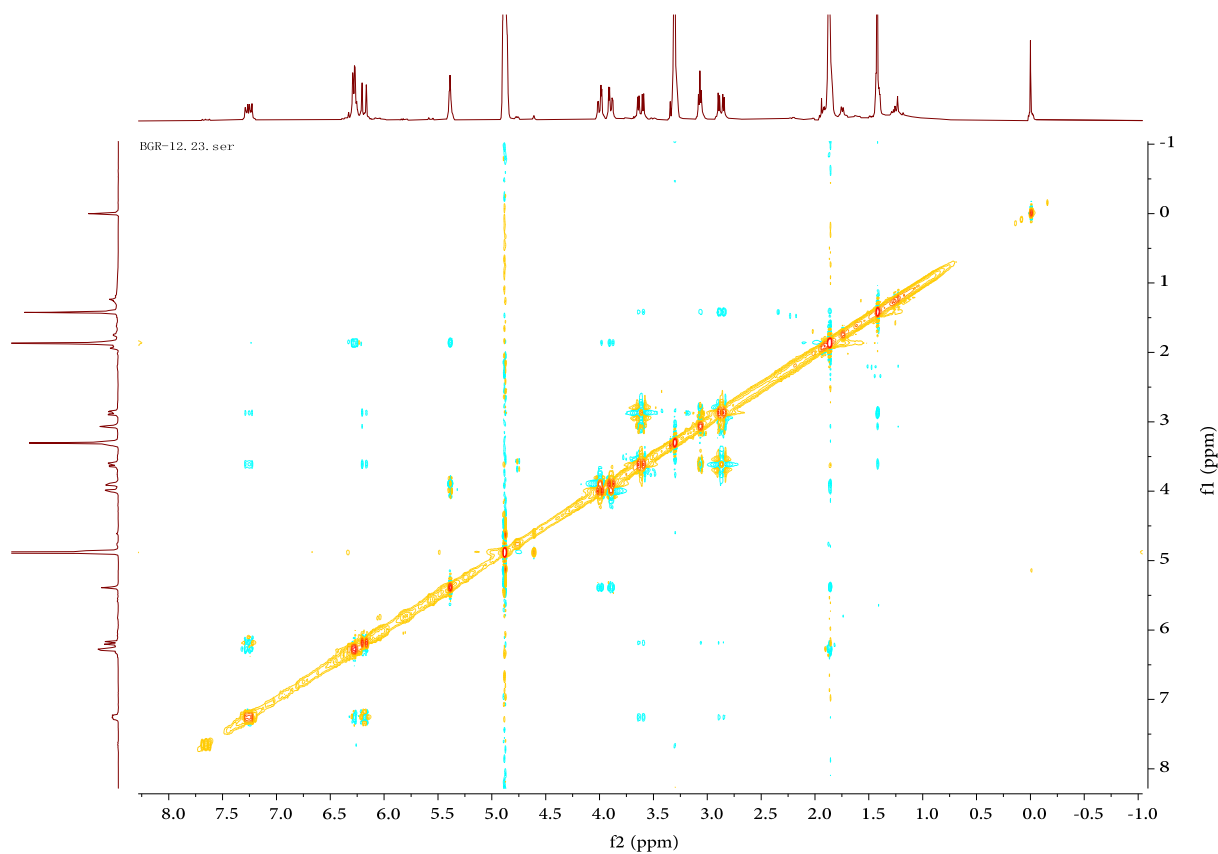

**Fig.S8.** NOE spectrum of compound **1** (CD<sub>3</sub>OD )

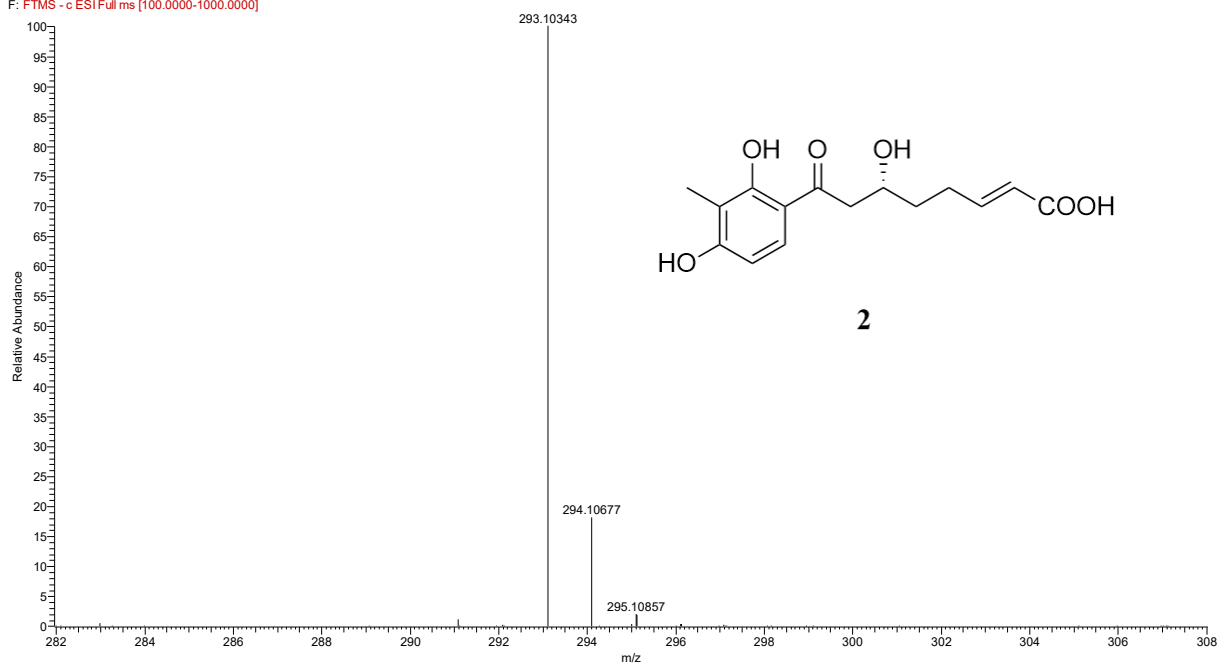**Fig.S9.** HRESIMS spectrum of compound **2**

BGR-13, 10. fid

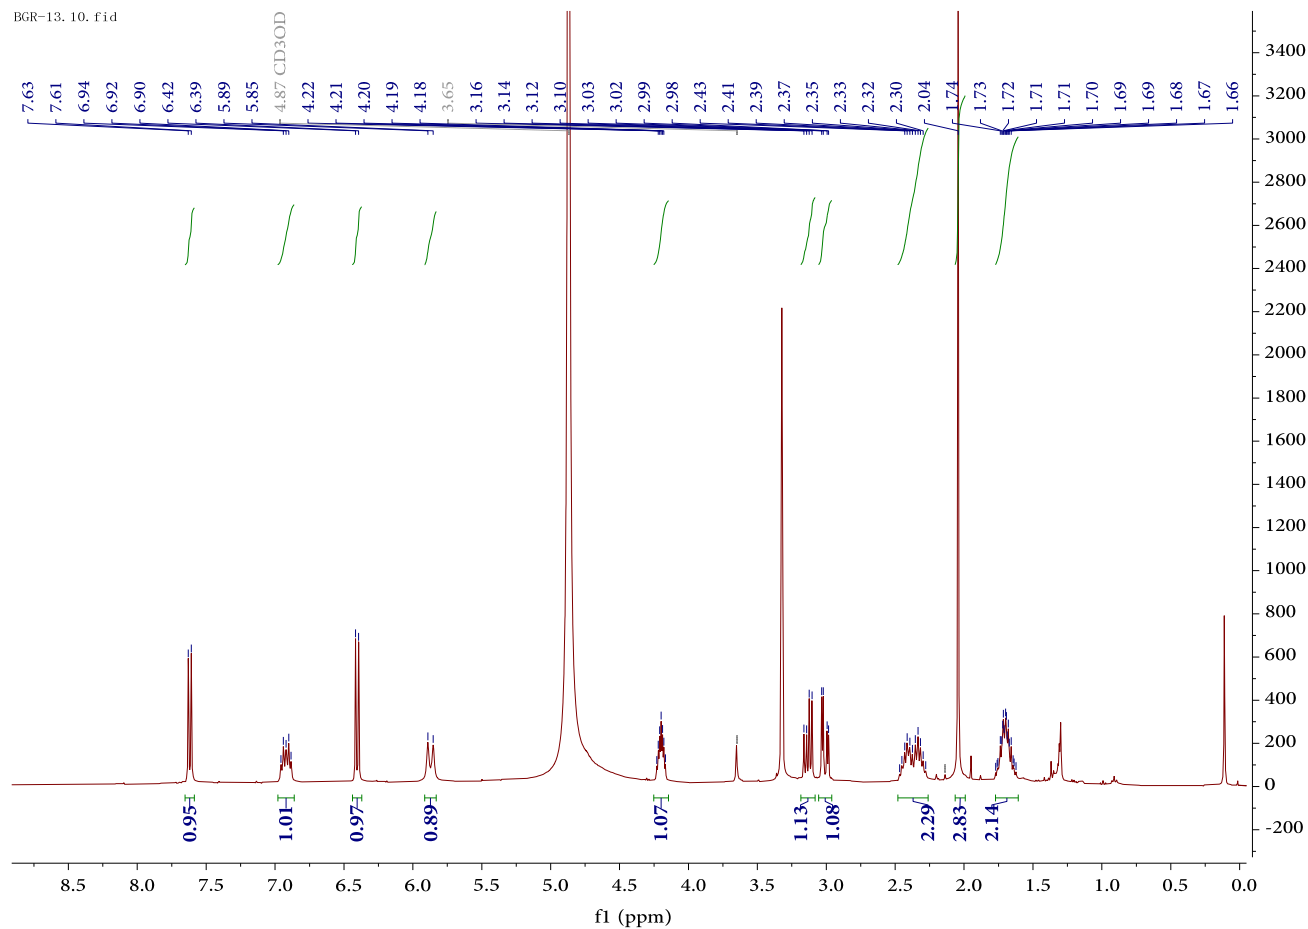**Fig.S10.** <sup>1</sup>H NMR spectrum of compound **2** (400 MHz, CD<sub>3</sub>OD)



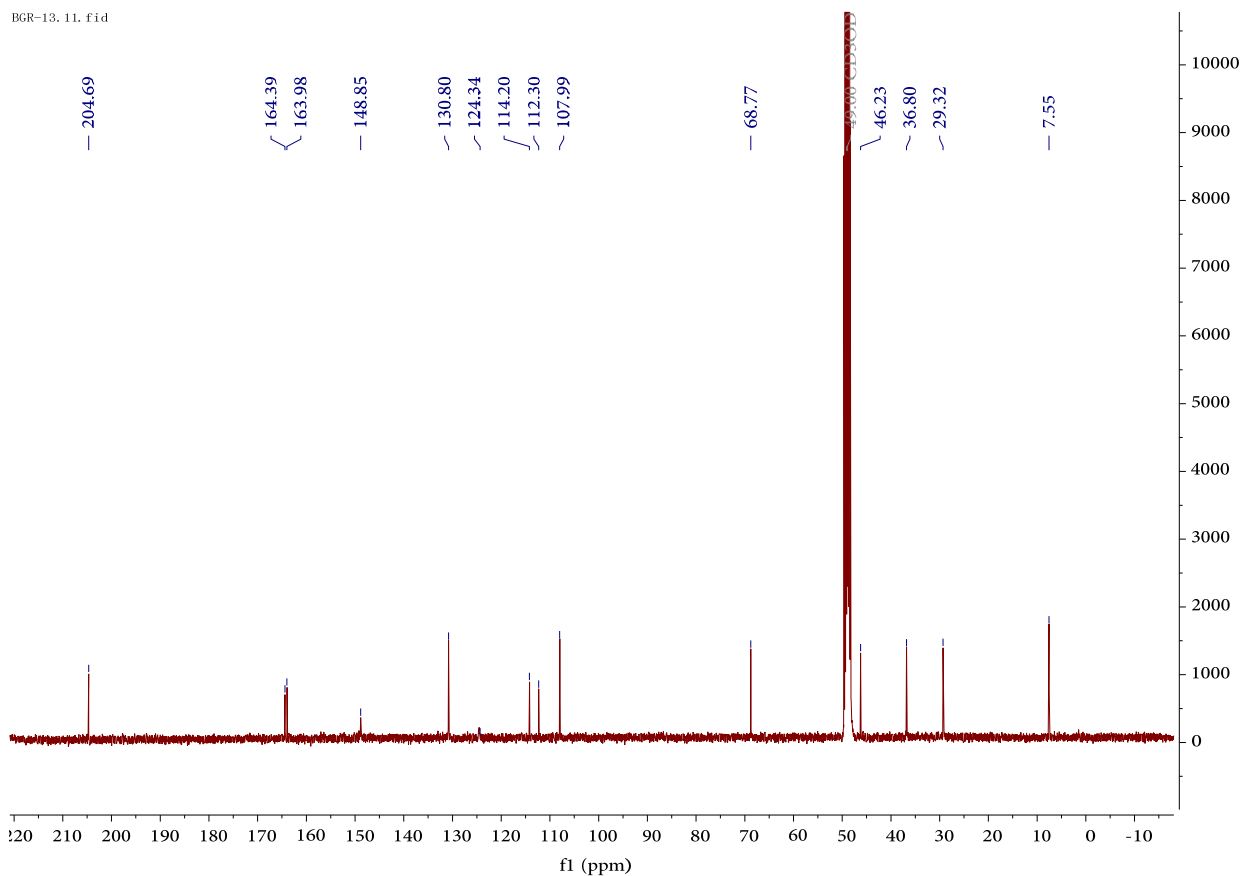

**Fig.S11.** <sup>13</sup>C NMR spectrum of compound **2** (400 MHz, CD<sub>3</sub>OD )

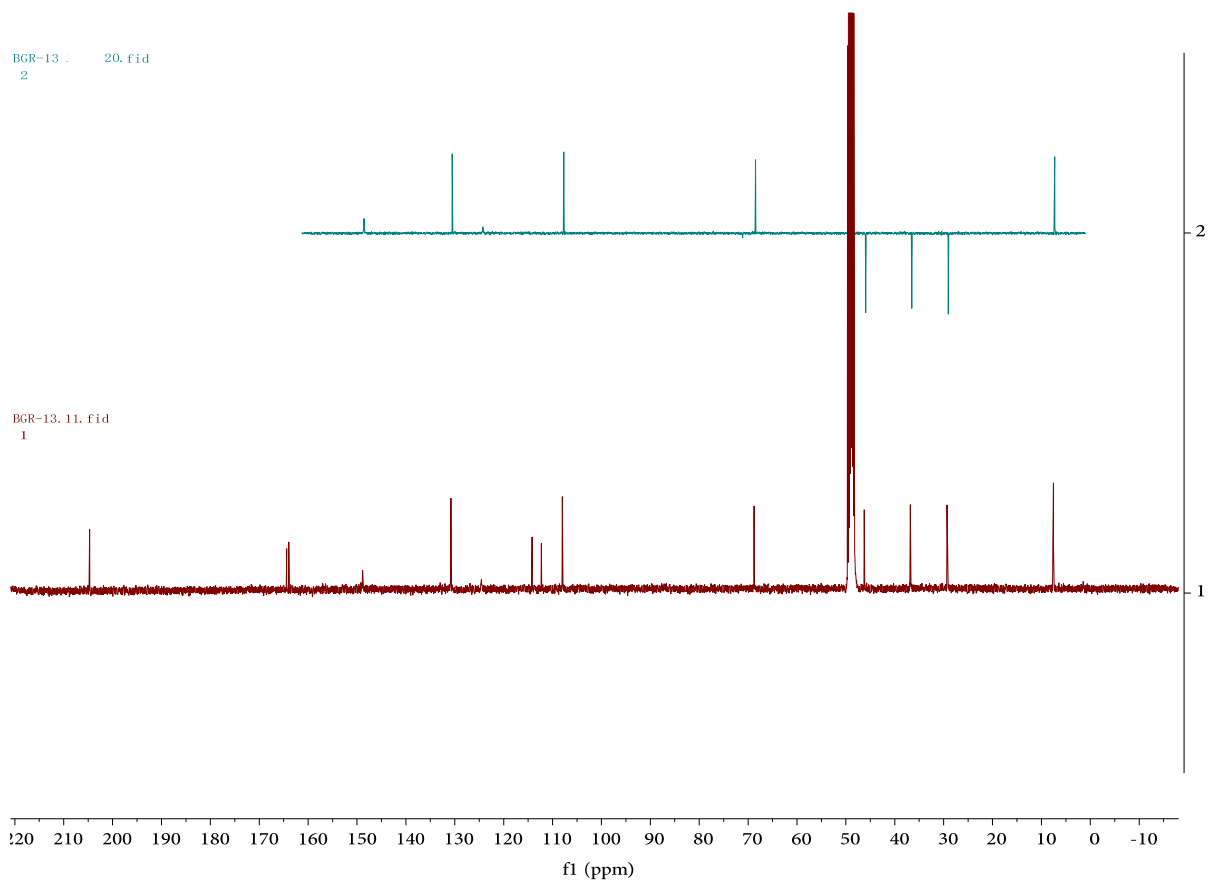

**Fig.S12.** DEPT135 spectrum of compound **2** (400 MHz, CD<sub>3</sub>OD )

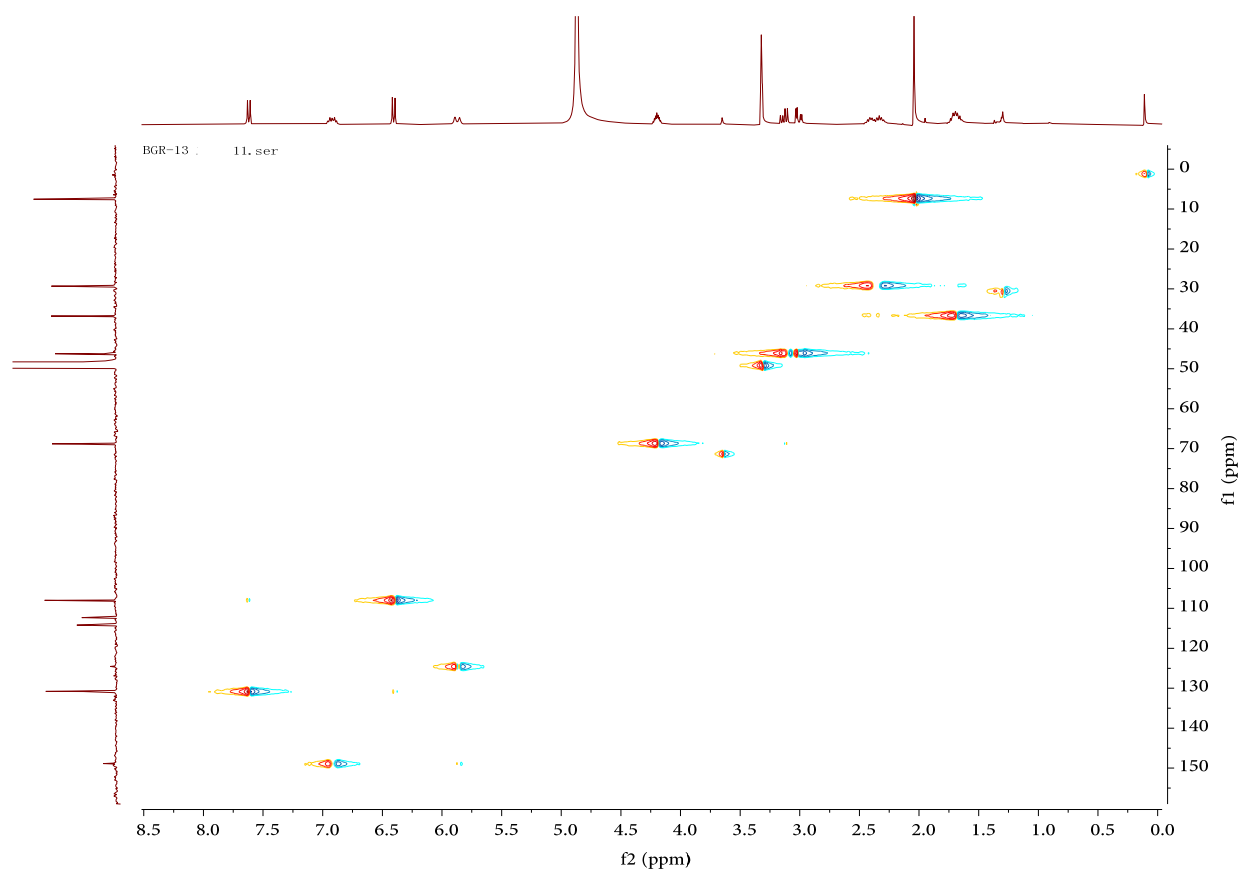

**Fig.S13.** HSQC spectrum of compound **2** (CD<sub>3</sub>OD )

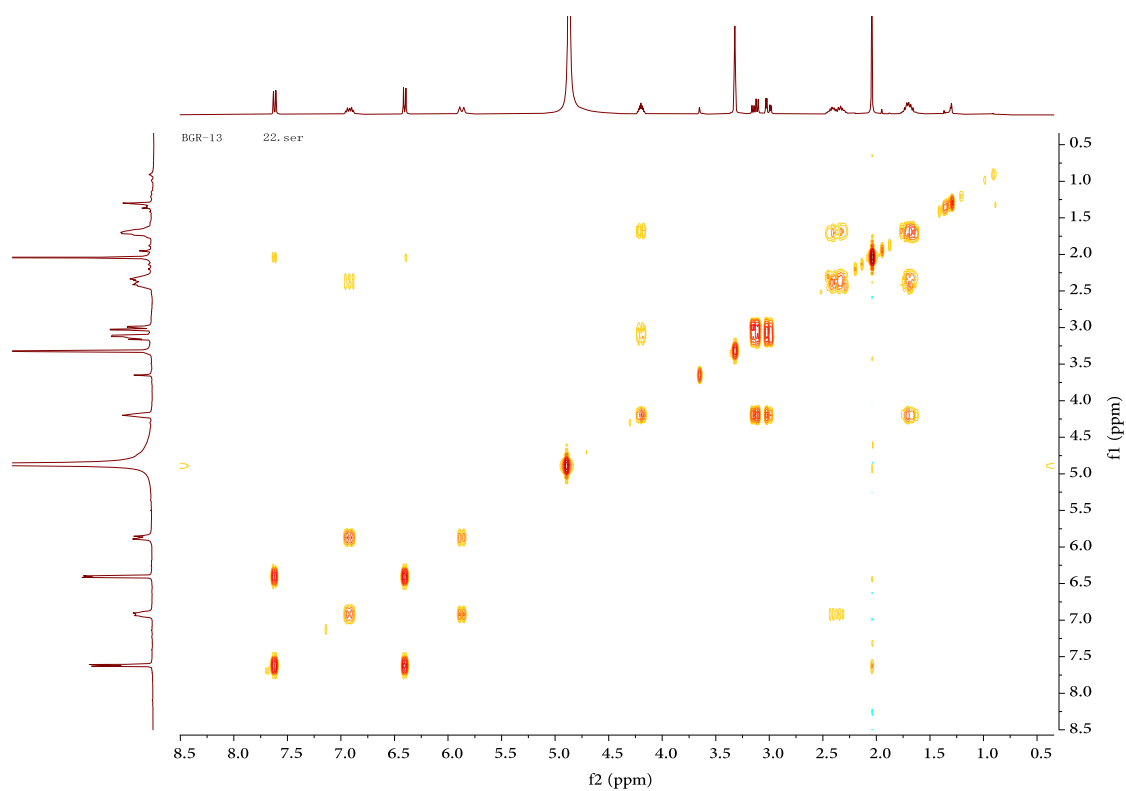

**Fig.S14.** H,H-COSY spectrum of compound **2** (CD<sub>3</sub>OD )

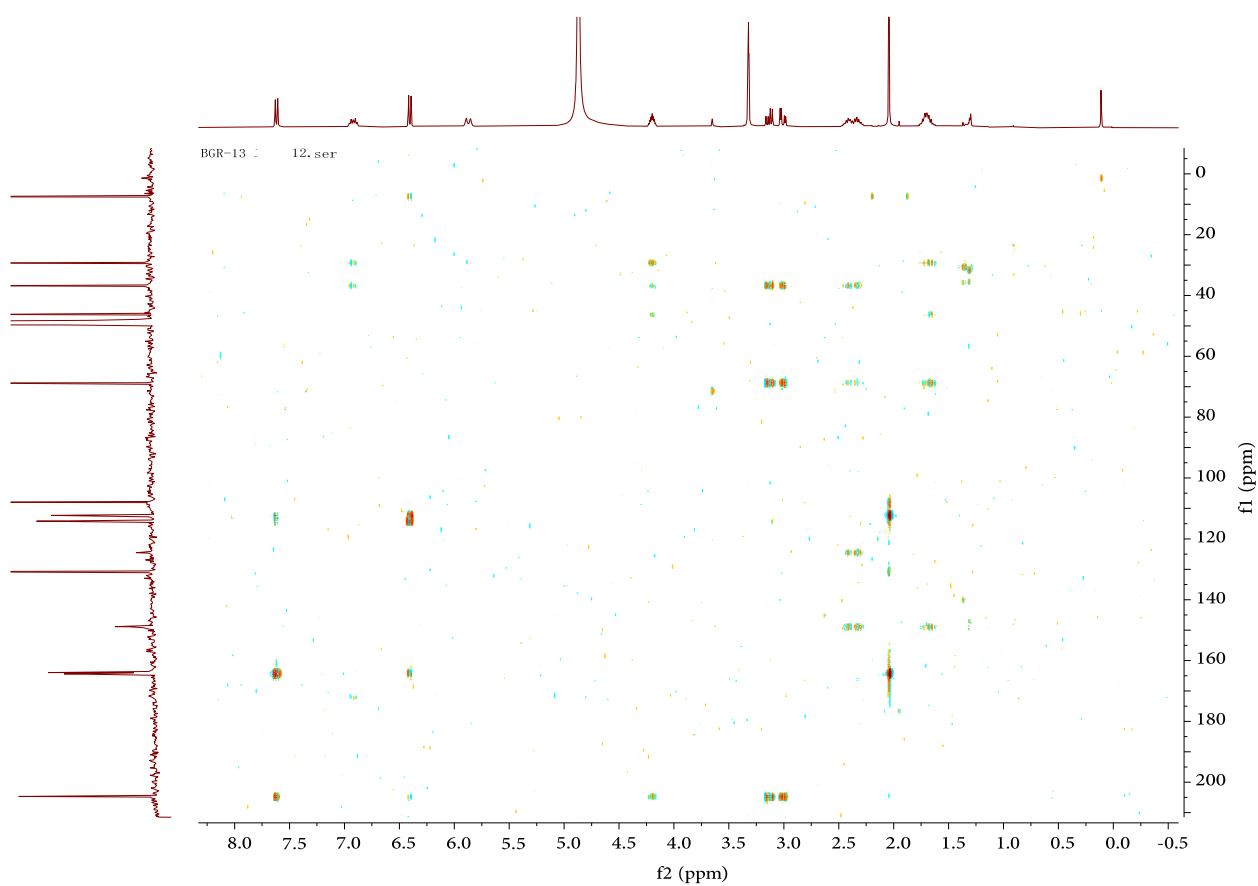

**Fig.S15.** HMBC spectrum of compound **2** (CD<sub>3</sub>OD )

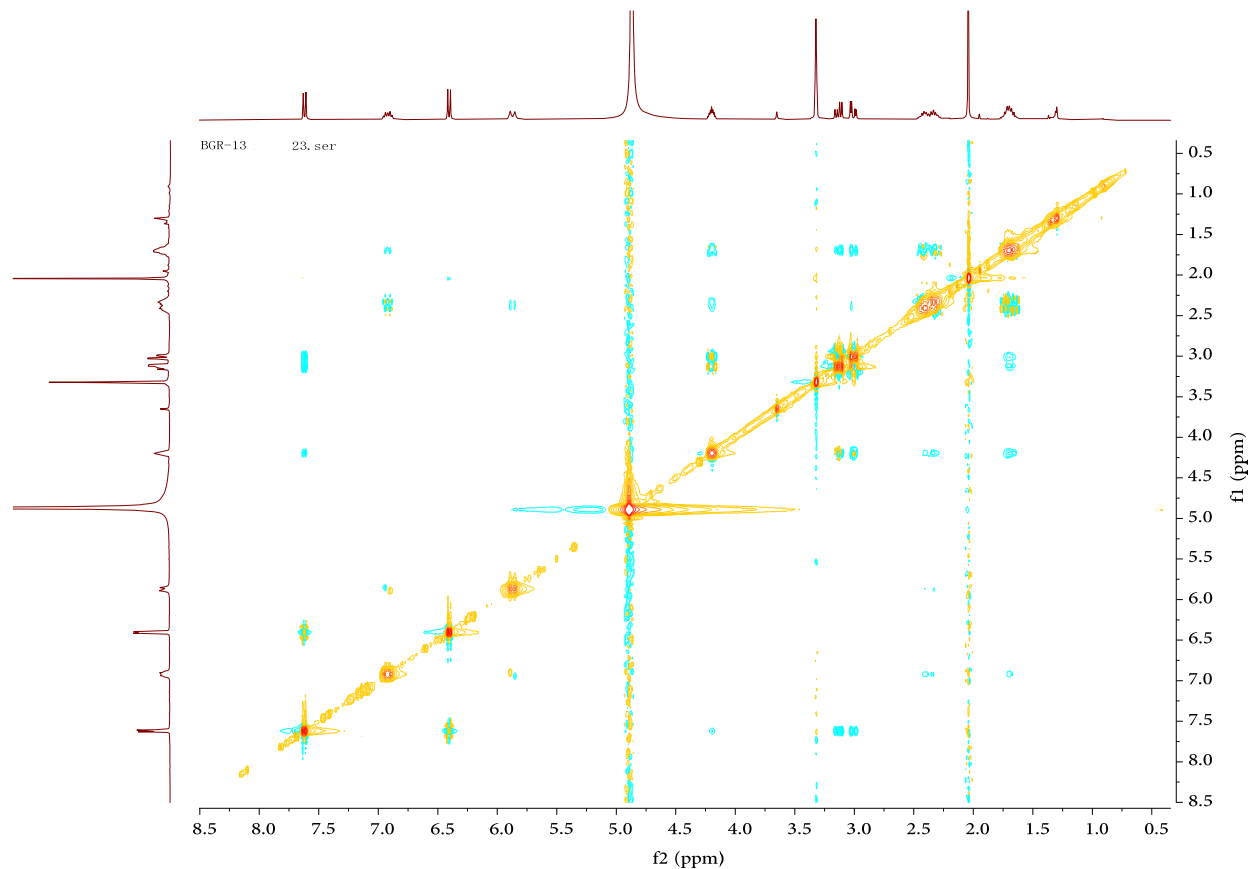

**Fig.S16.** NOE spectrum of compound **2** (CD<sub>3</sub>OD )

BGR-1-NEG #28 RT: 0.50 AV: 1 NL: 3.11E9  
T: FTMS - p ESI Full ms [100.0000-1000.0000]

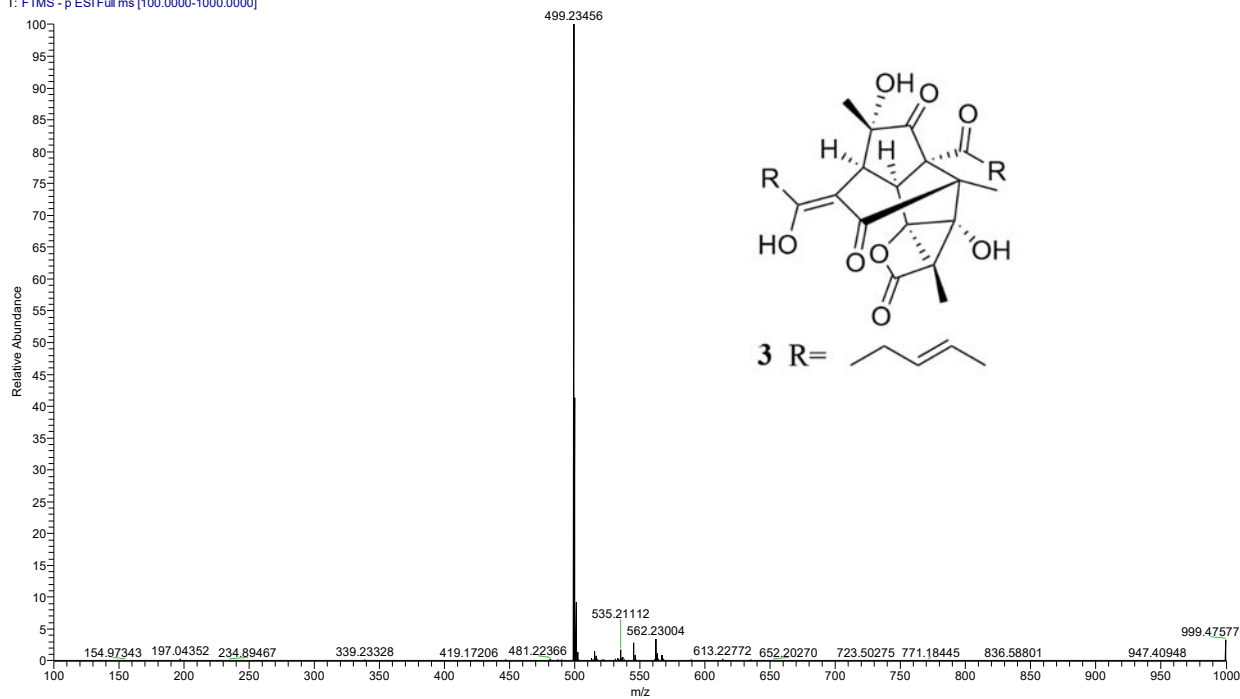

**Fig.S17.** HRESIMS spectrum of compound **3**

bgr-1.10.fid

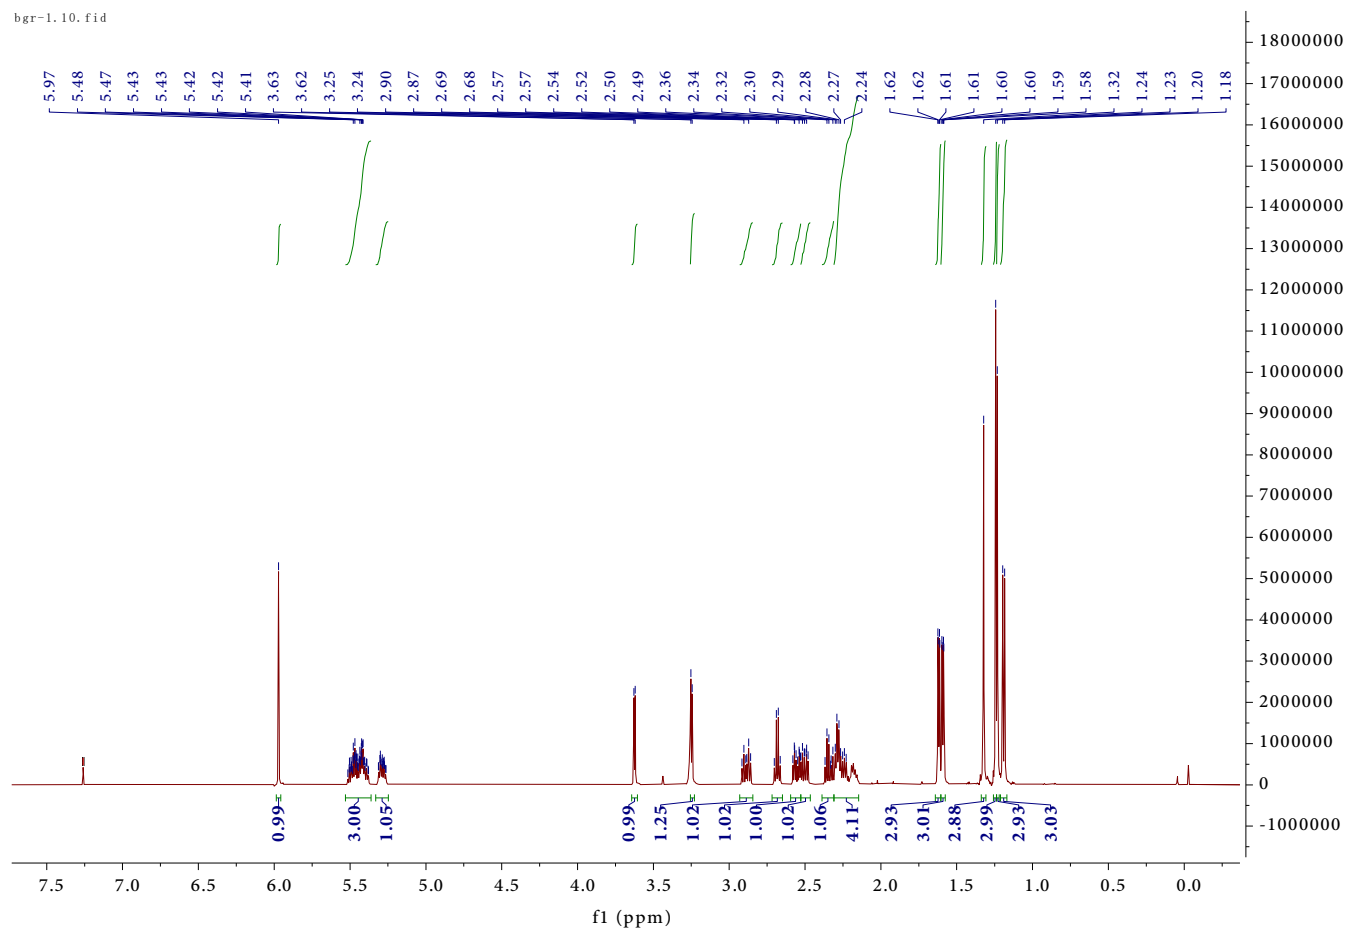

**Fig.S18.**  $^1\text{H}$  NMR spectrum of compound **3** (400 MHz,  $\text{CDCl}_3$ )

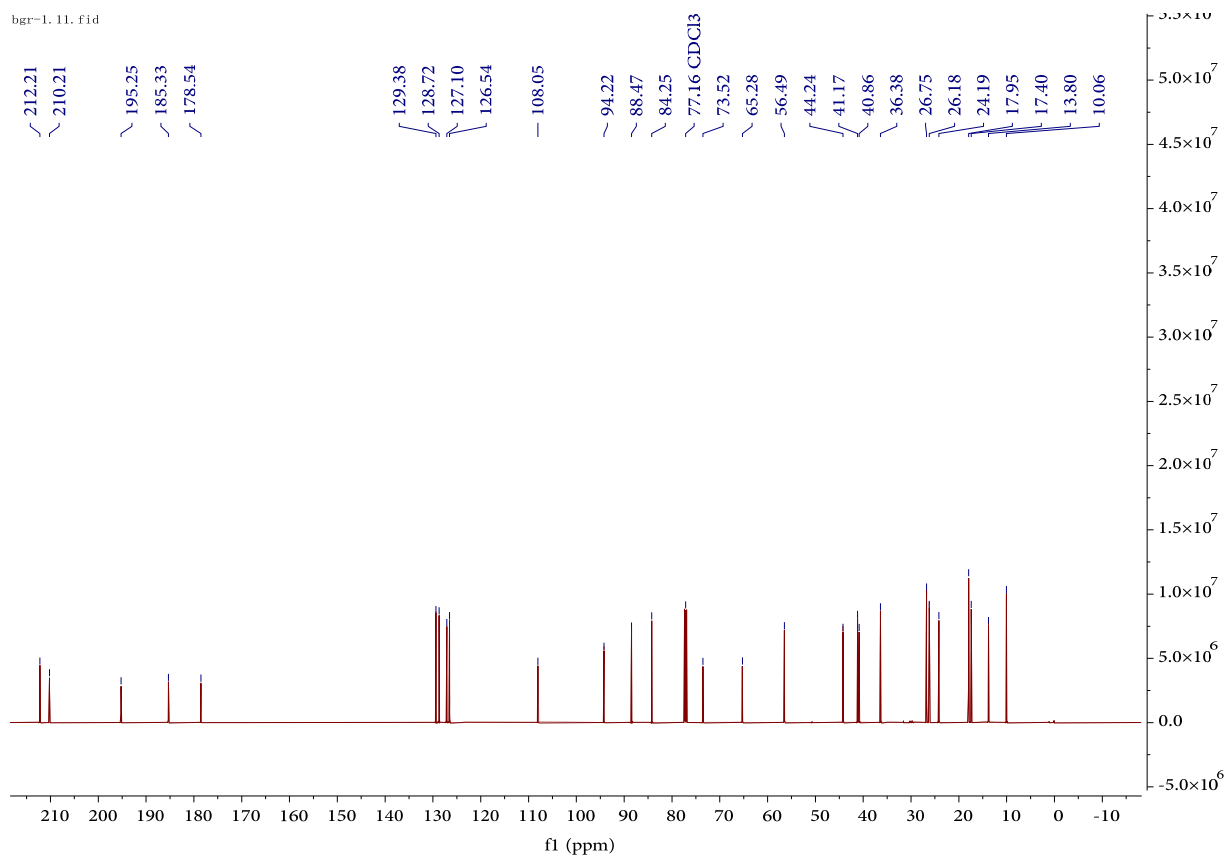

**Fig.S19.**  $^{13}\text{C}$  NMR spectrum of compound **3** (400 MHz,  $\text{CDCl}_3$ )

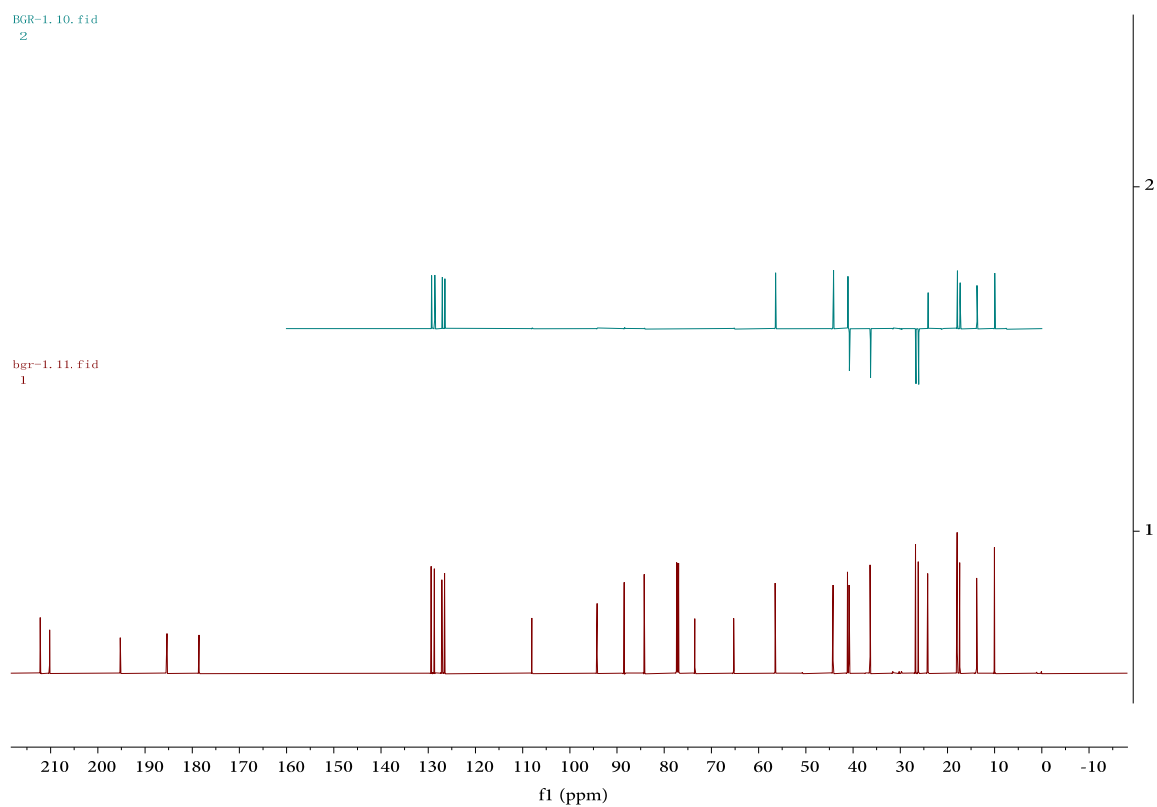

**Fig.S20.** DEPT135 spectrum of compound **3** (400 MHz,  $\text{CDCl}_3$ )

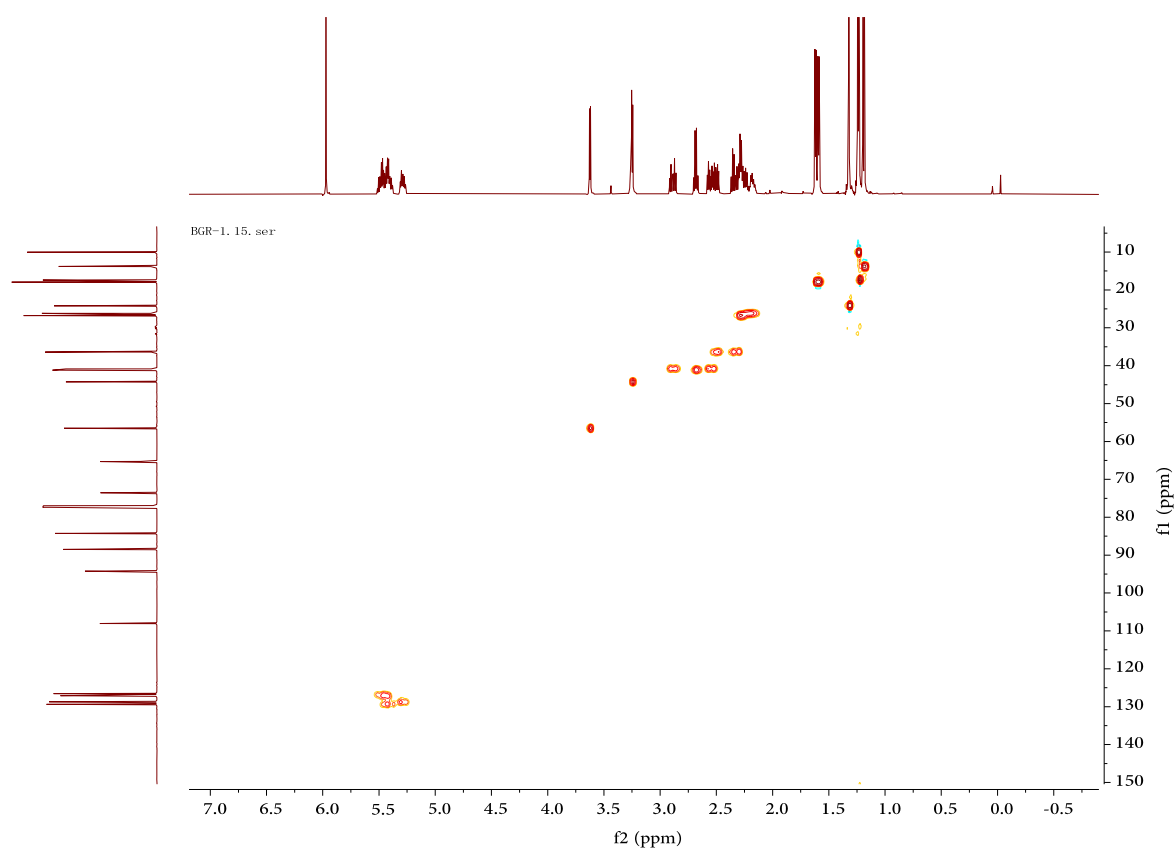

**Fig.S21.** HSQC spectrum of compound **3** (CDCl<sub>3</sub>)

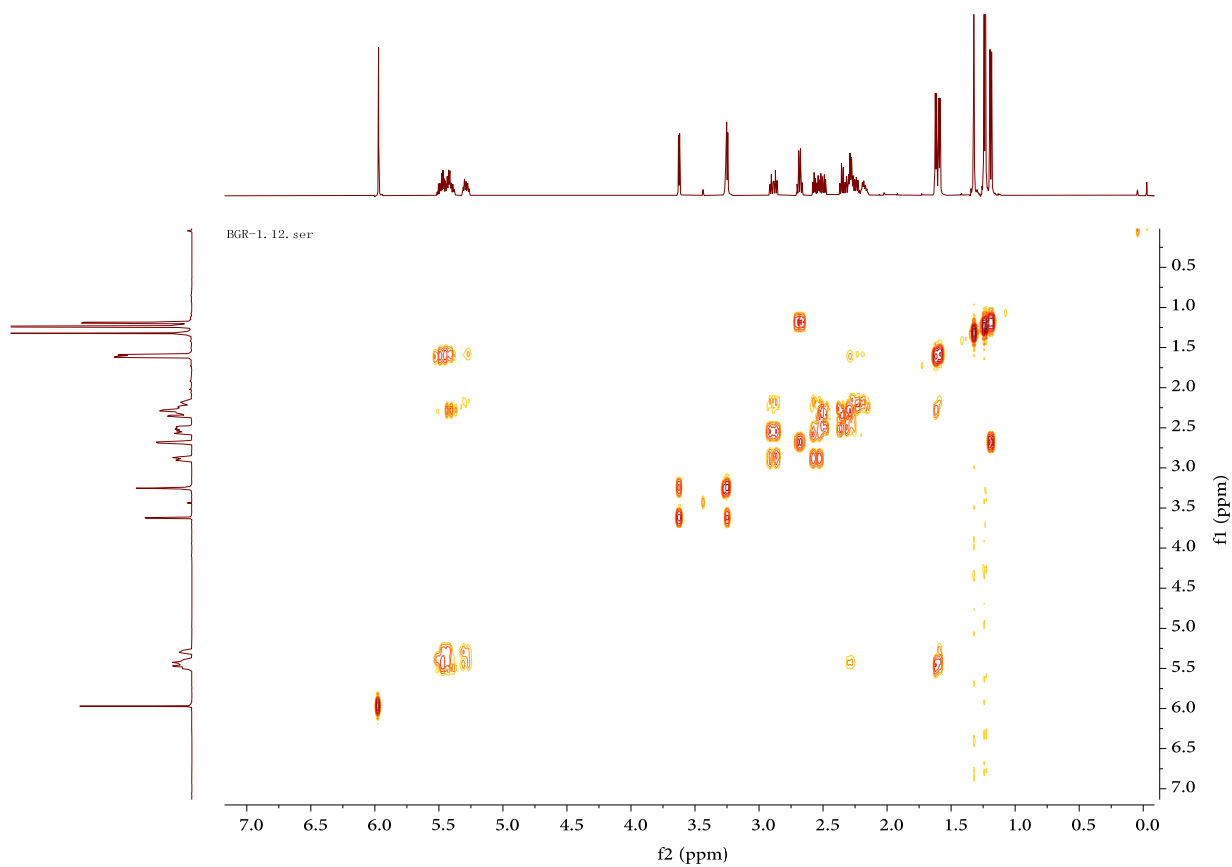

**Fig.S22.** H,H-COSY spectrum of compound **3** (CDCl<sub>3</sub>)

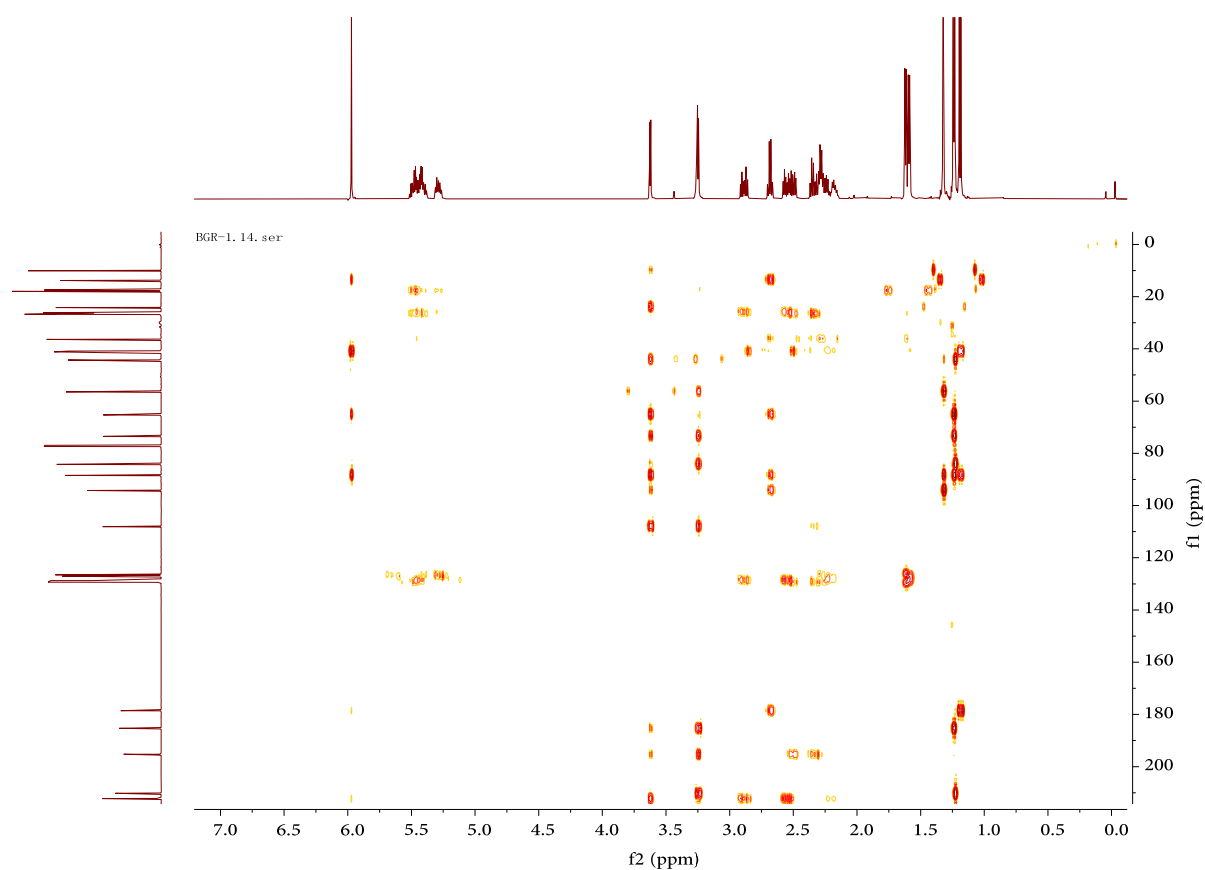

**Fig.S23.** HMBC spectrum of compound **3** ( $\text{CDCl}_3$ )

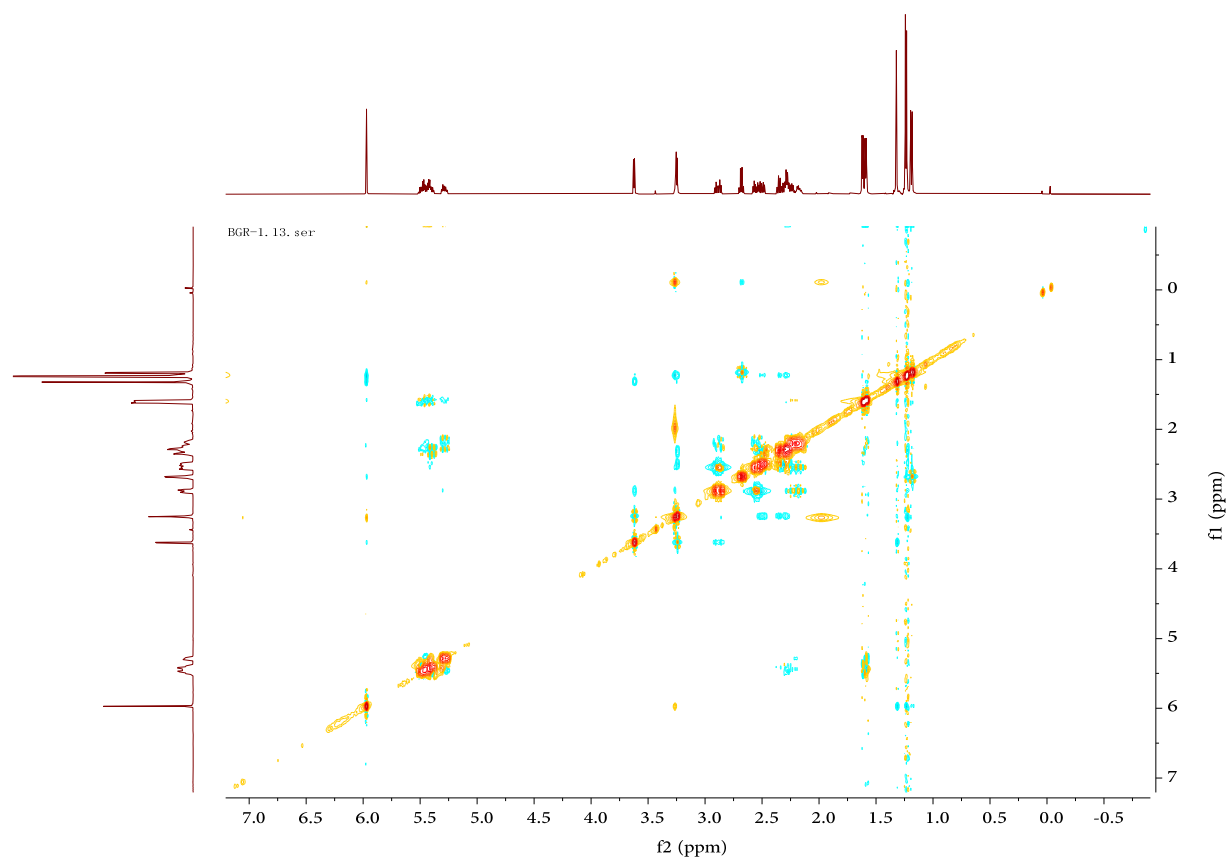

**Fig.S24.** NOE spectrum of compound **3** ( $\text{CDCl}_3$ )

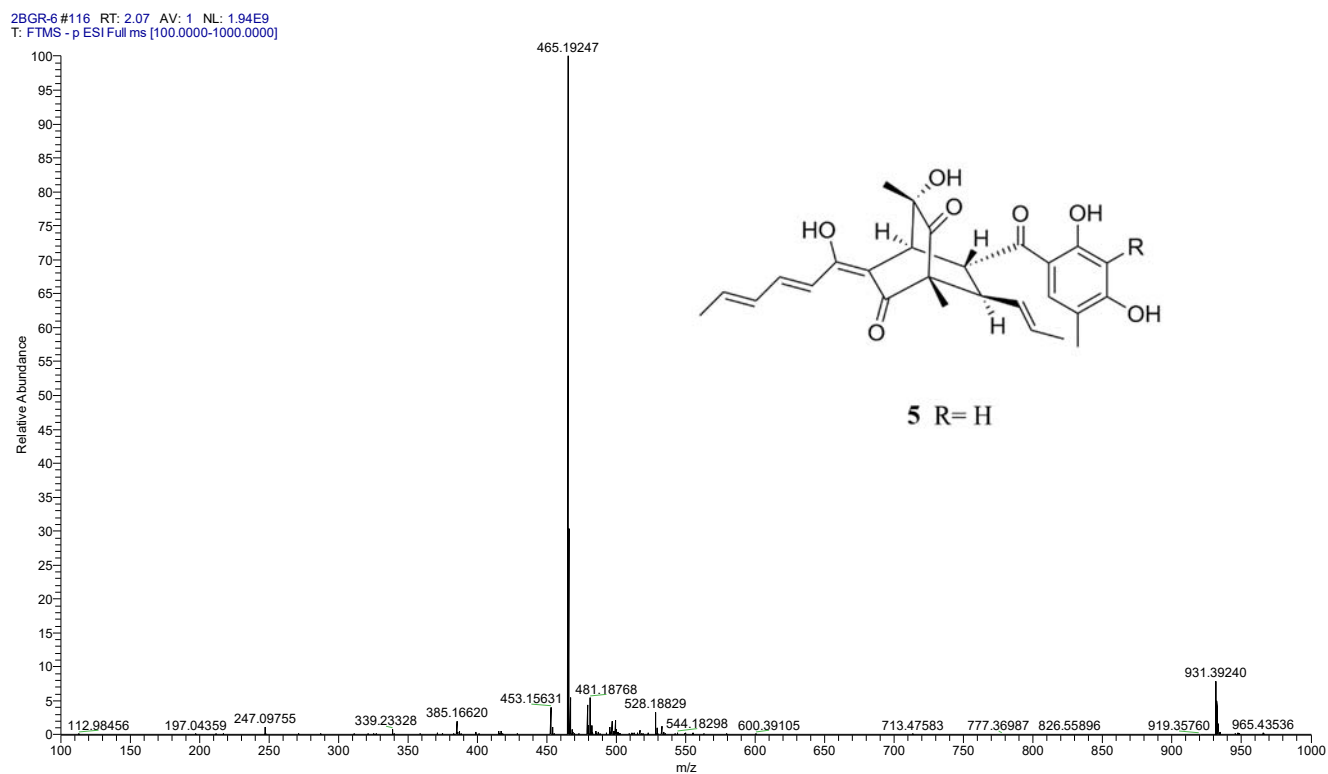

**Fig.S25.** HRESIMS spectrum of compound **5**

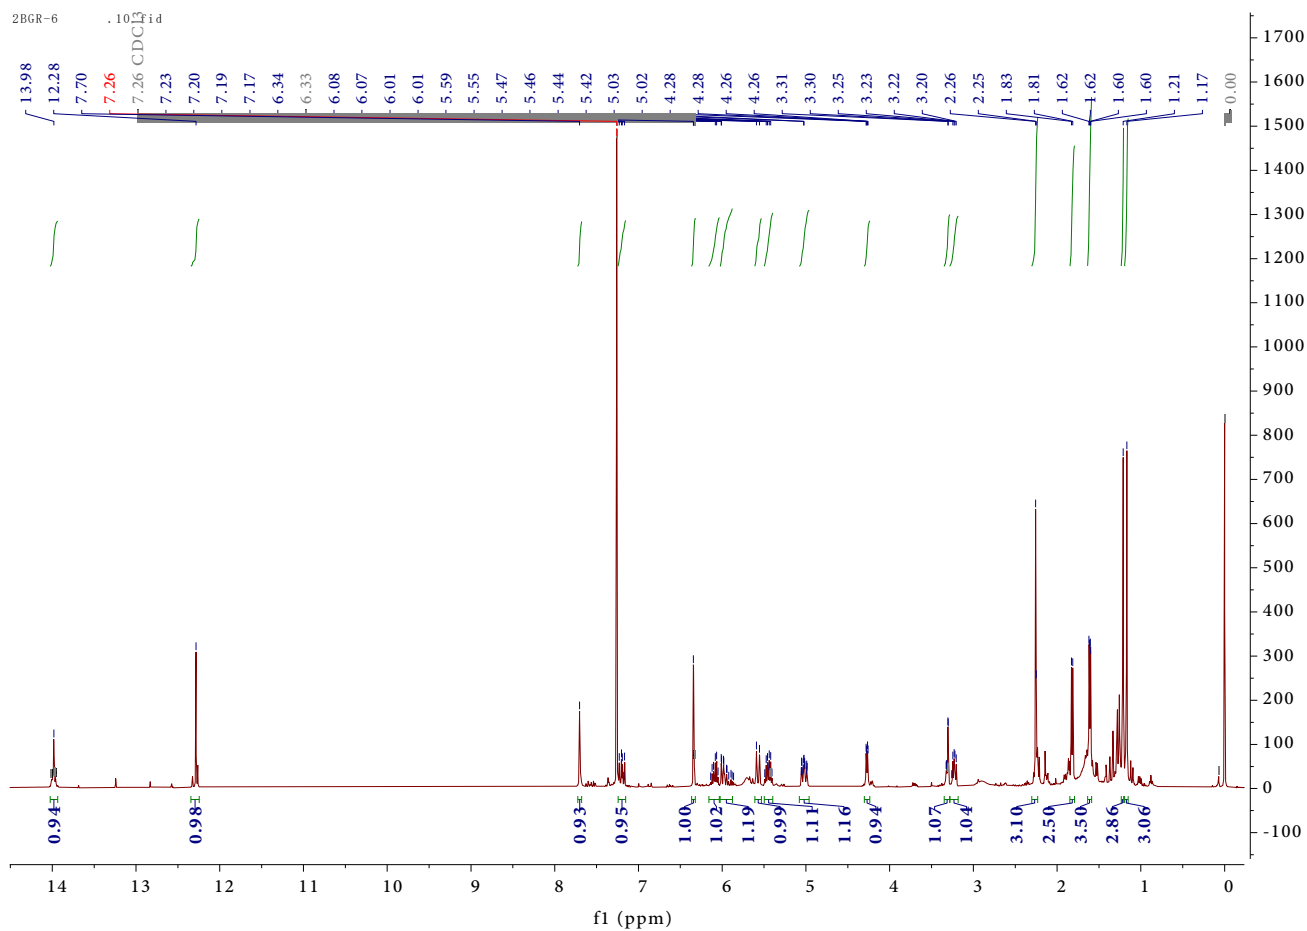

**Fig.S26.**  $^1\text{H}$  NMR spectrum of compound **5** (400 MHz,  $\text{CDCl}_3$ )



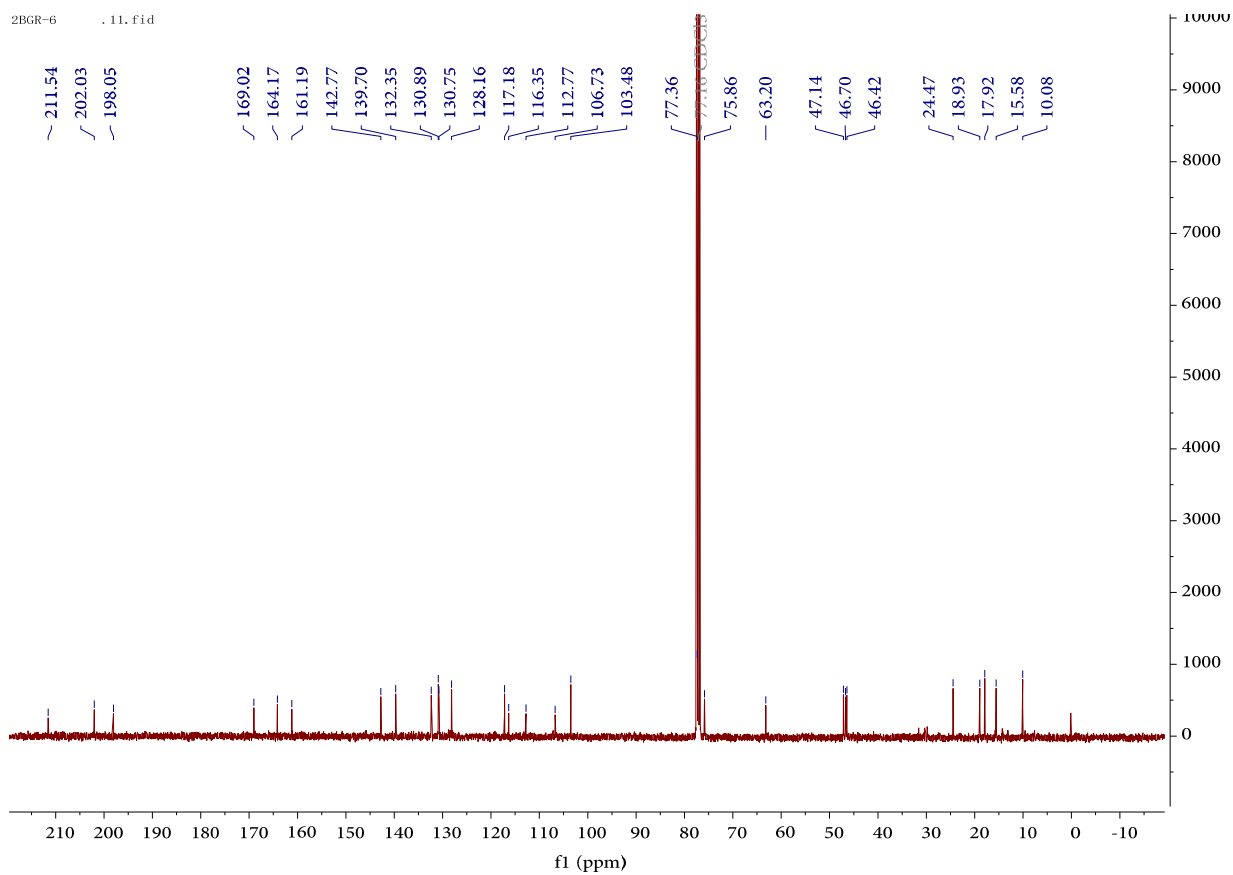

**Fig.S27.**  $^{13}\text{C}$  NMR spectrum of compound **5** (400 MHz,  $\text{CDCl}_3$ )

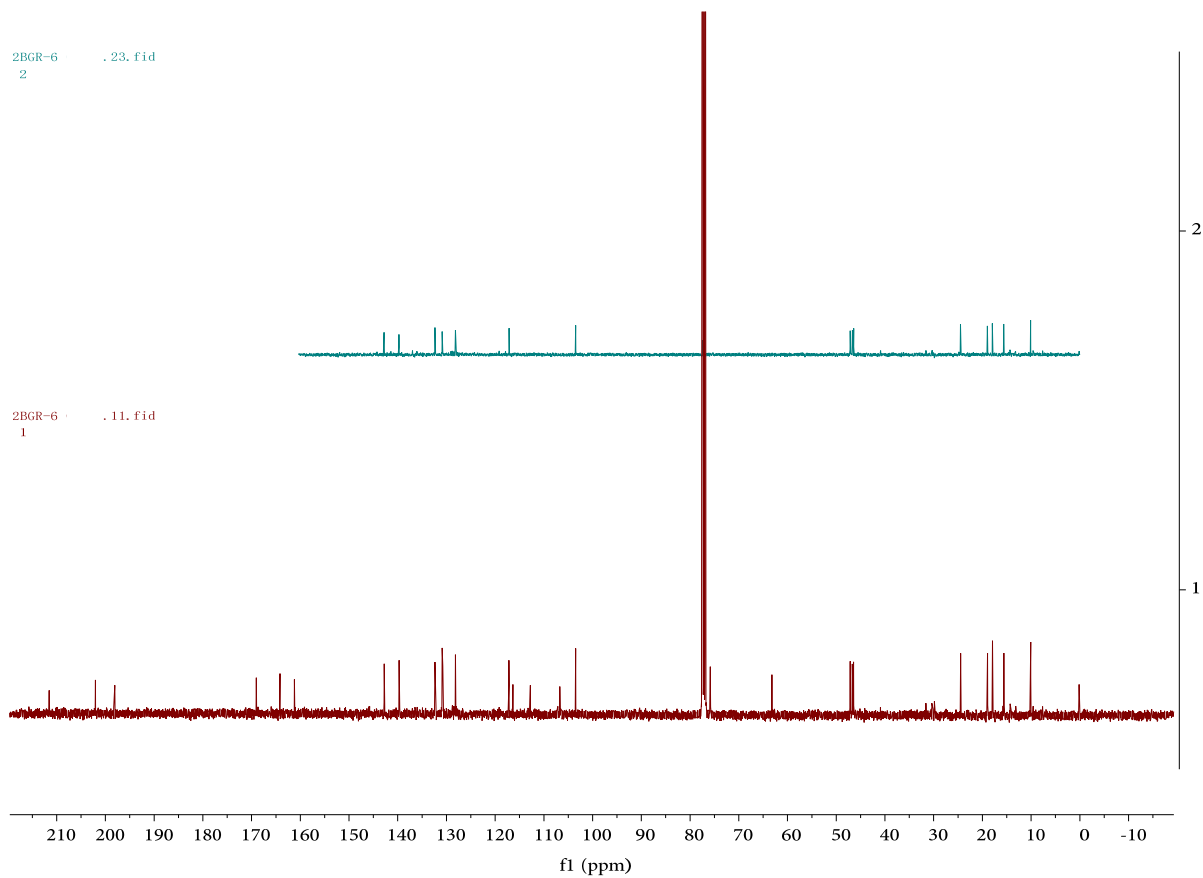

**Fig.S28.** DEPT135 spectrum of compound **5** (400 MHz,  $\text{CDCl}_3$ )

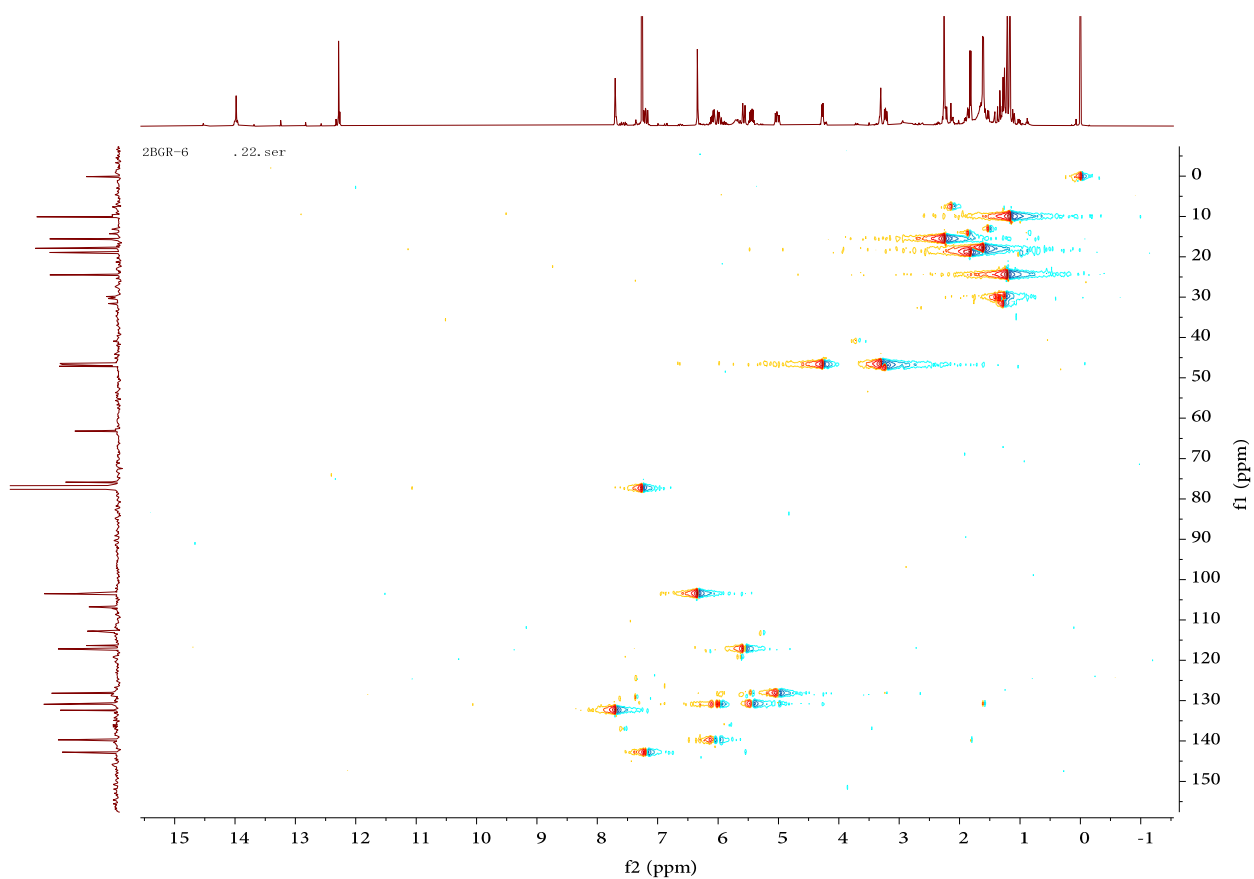

**Fig.S29.** HSQC spectrum of compound **5** (CDCl<sub>3</sub> )

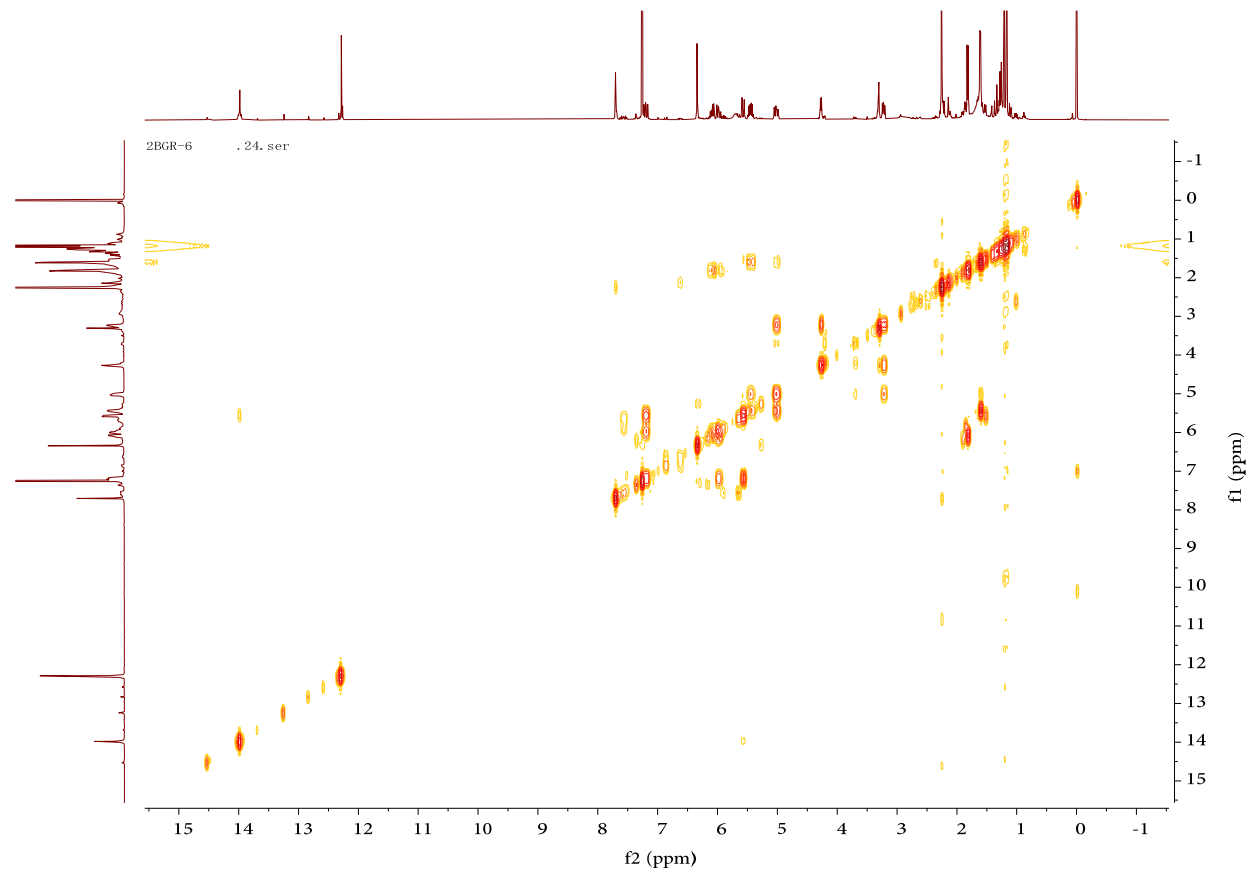

**Fig.S30.** H,H-COSY spectrum of compound **5** (CDCl<sub>3</sub> )

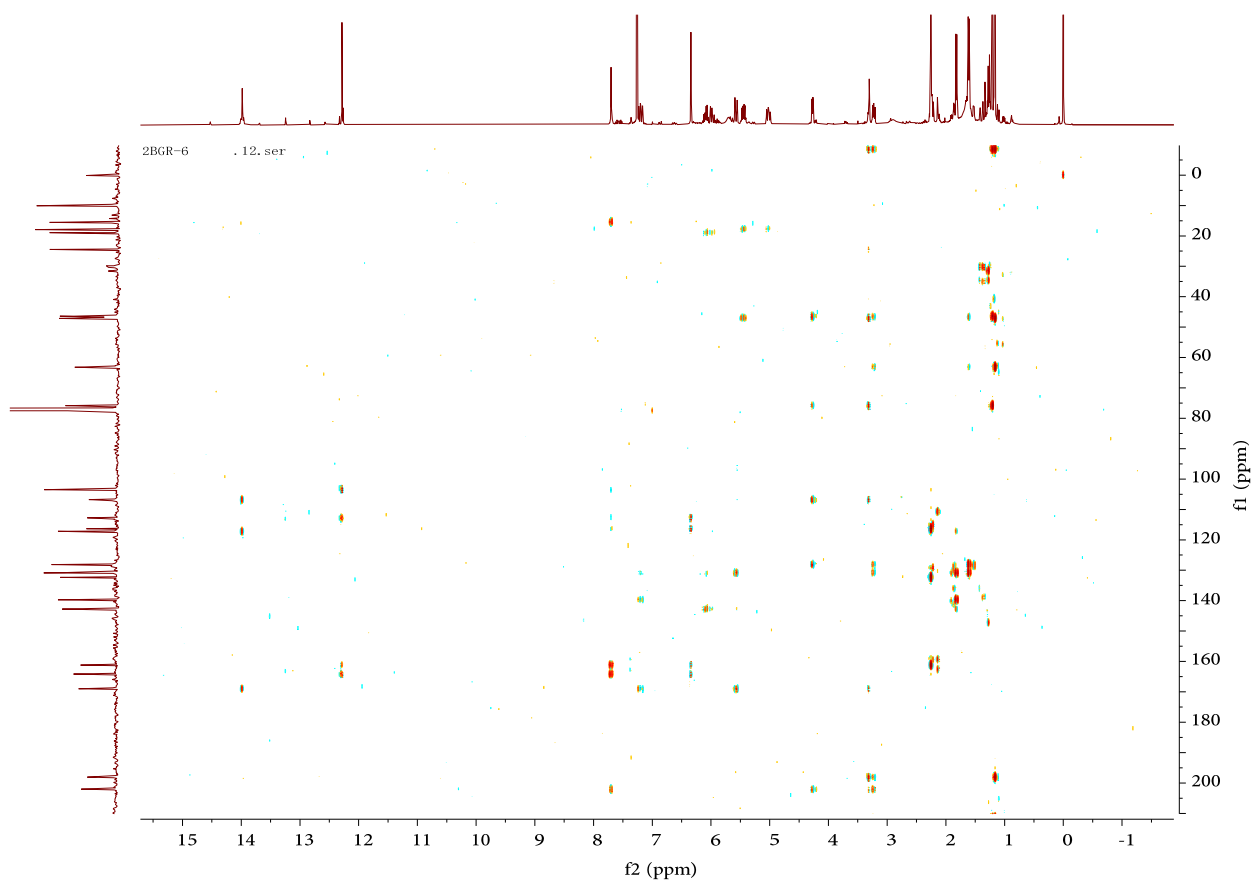

**Fig.S31.** HMBC spectrum of compound **5** (CDCl<sub>3</sub>)

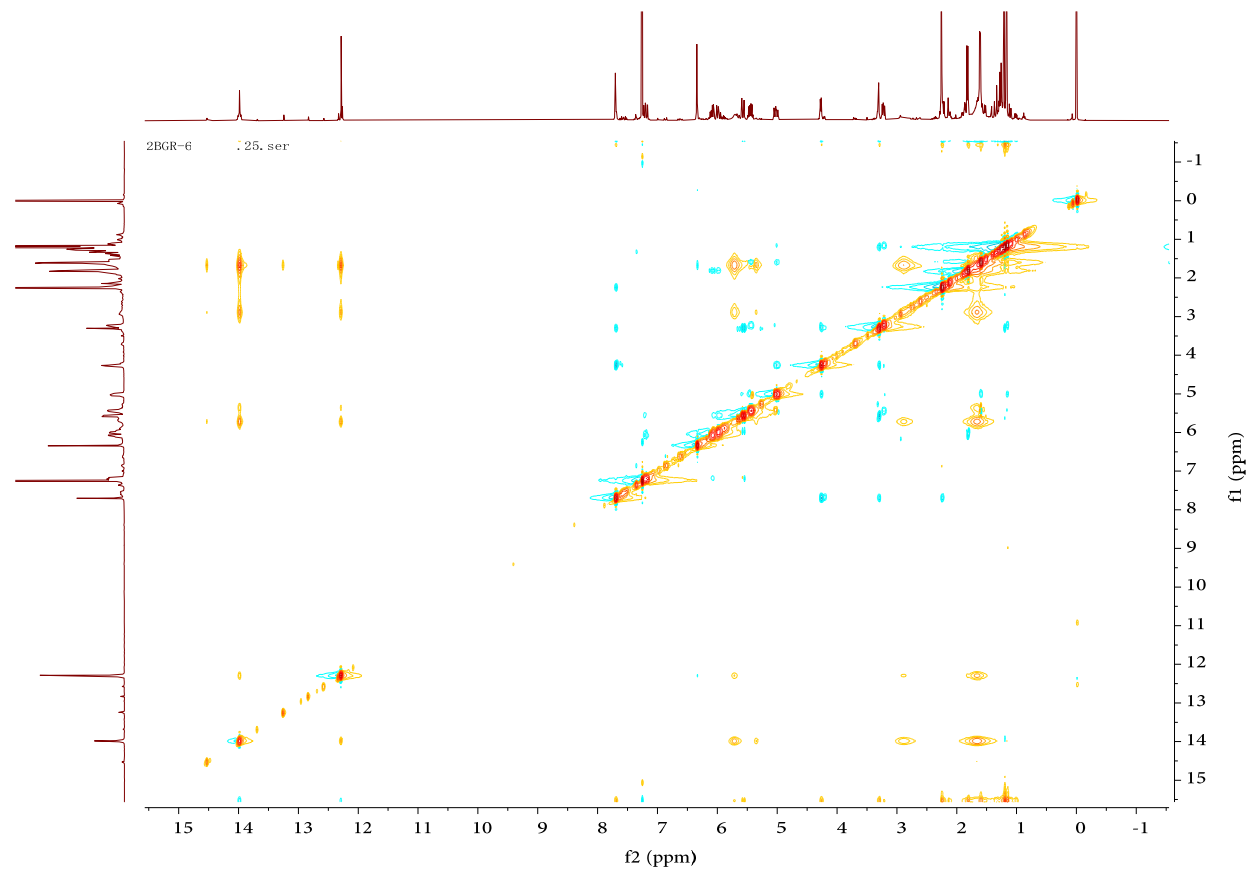

**Fig.S32.** NOE spectrum of compound **5** (CDCl<sub>3</sub>)

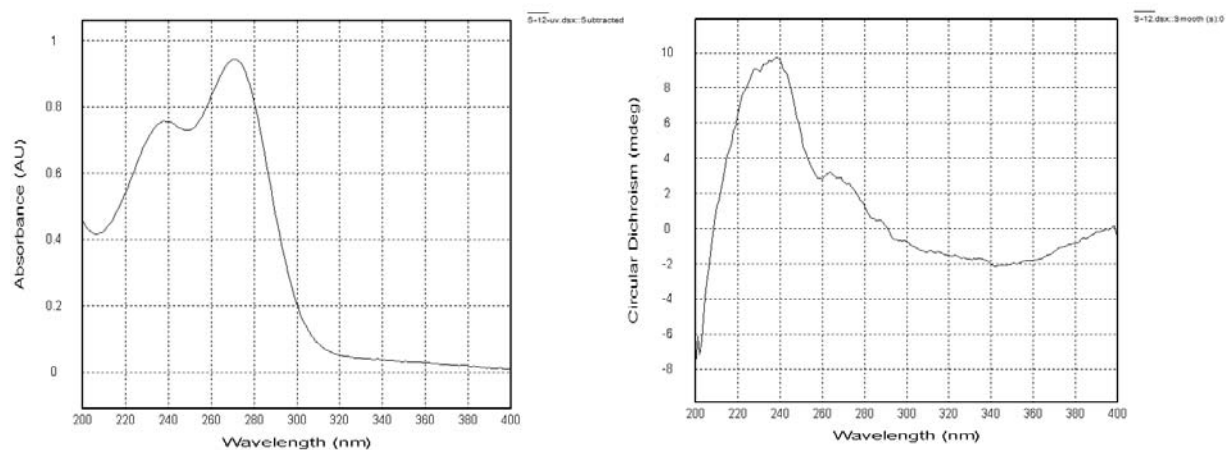

**Fig.S33.** UV and ECD of compound **1** (CH<sub>3</sub>OH )

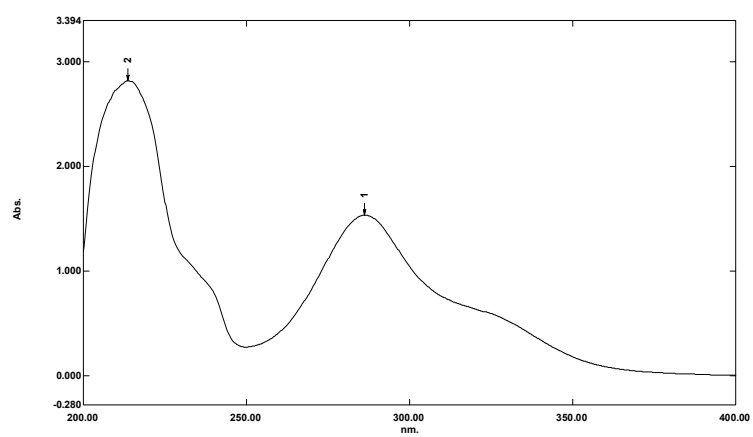

**Fig.S34.** UV of compound **2** (CH<sub>3</sub>OH )

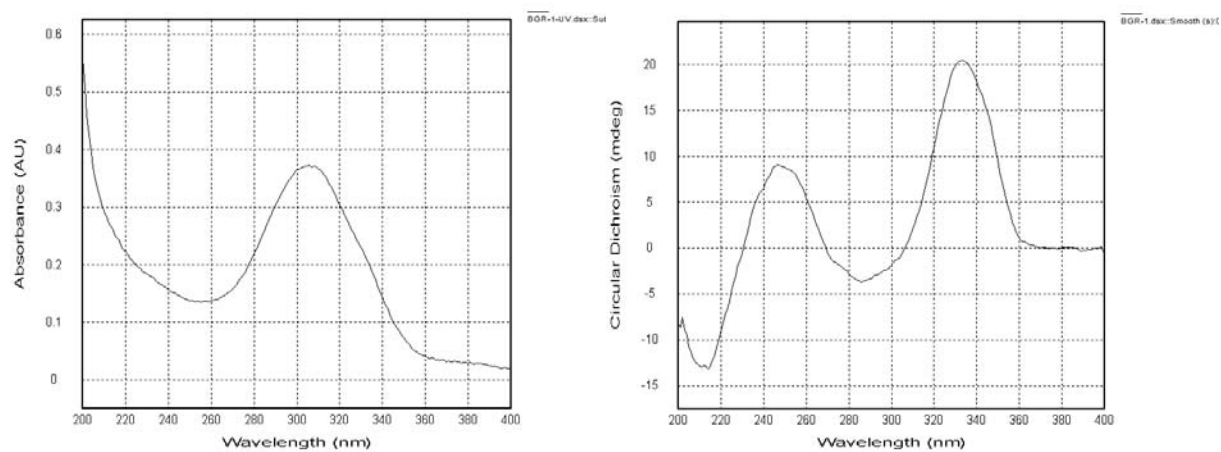

**Fig.S35.** UV and ECD of compound **3** (CH<sub>3</sub>OH )

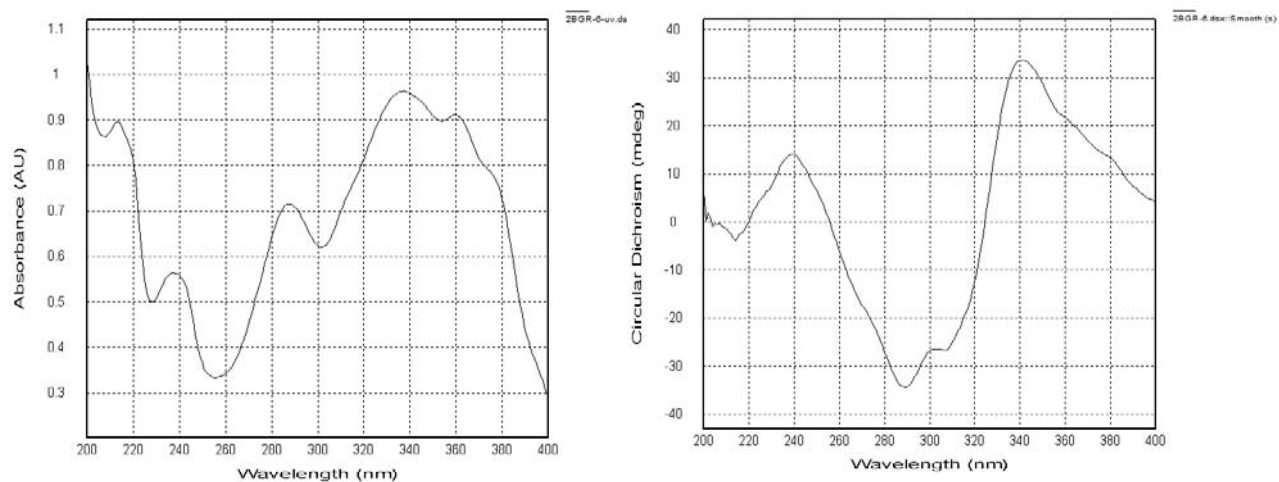

**Fig.S36.** UV and ECD of compound **5** (CH<sub>3</sub>OH)

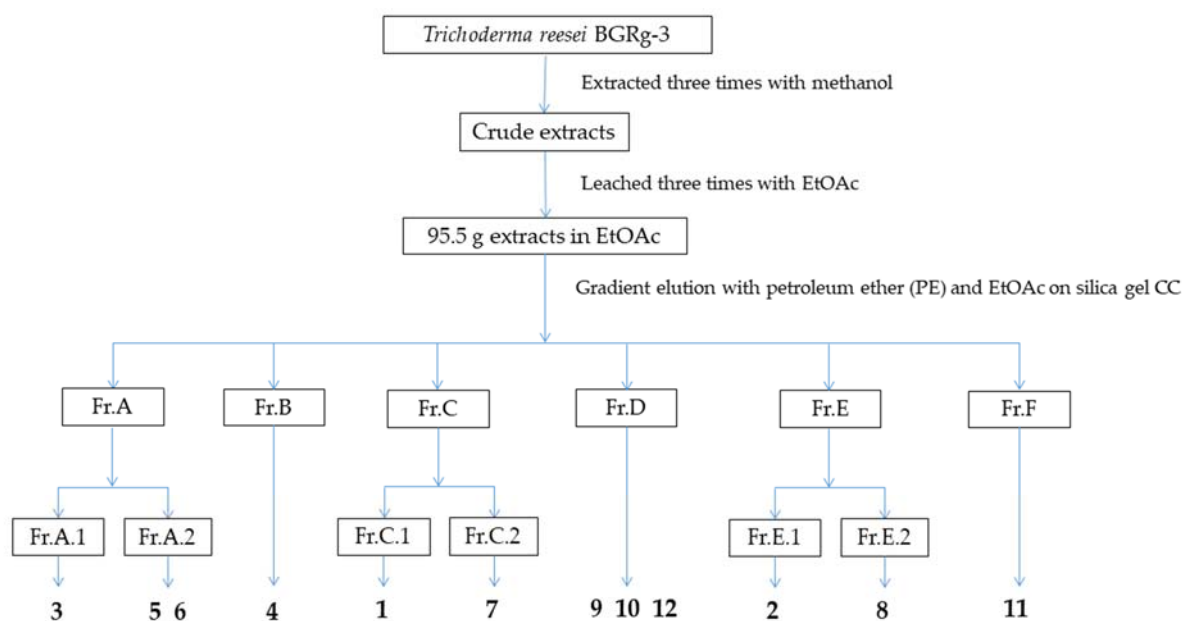

**Fig.S37.** Isolation procedure

#### Biosynthesis pathway

Biosynthesis pathways of sorbicillinoids had been explored in depth [1-3]. Recent study [2] showed that a triketide intermediate (**a**) was first synthesized through one acetyl-CoA and two malonyl-CoA (**Fig S38**). The intermediate was then elongated by several malonyl-CoA. Generally, three malonyl-CoA were used for lengthening the carbon chains to give (**1b**). Meanwhile, two methyl may be introduced with C-methyltransferase (C-MeT) domain of the polyketide synthase. Then intermediate (**1b**) undergone knoevenagel condensation to give the first isolatable

intermediate sorbicillin (**1c**) and other possible intermediates. These mono-sorbicillinoids, for further reactions, were stereoselectively catalyzed to give the key intermediate (**1d**) by an FAD-dependent monooxygenase (FMO, SorC) [2,3], which was then reduced to generate **11**, or performed further reactions (**Fig S39**). It was reported that compound **12** was possibly the premature off-loading by-product when generating (**1b**). Therefore, it was assumed that only 2 malonyl-CoA were added to the carbon chains, leading to the production of intermediate (**2b**). Keto-enol tautomerism, annulation and oxidation were performed to generate **12**. Moreover, elongated by four malonyl-CoA from (**a**), intermediate (**3b**) then proceed Knoevenagel condensation to give (**3c**), which finally generated compound **2**.

Diels-Alder reaction and Michael reaction were significant pathways in the biosynthesis of dimeric sorbicillinoids [1,2]. Based on the key intermediate (**1d**), DA reactions were proceeded with different dienophiles, generating bisorbicillinol, compounds **5** and **6**. Bisorbicillinol further performed intramolecular rearrangements and Michael-addition-like reactions to give compounds **3**, **4**, **8** and their analogues. Intermediate (**1d**) could also perform intermolecular Michael dimerization reactions to generate compounds **9** and **10**.

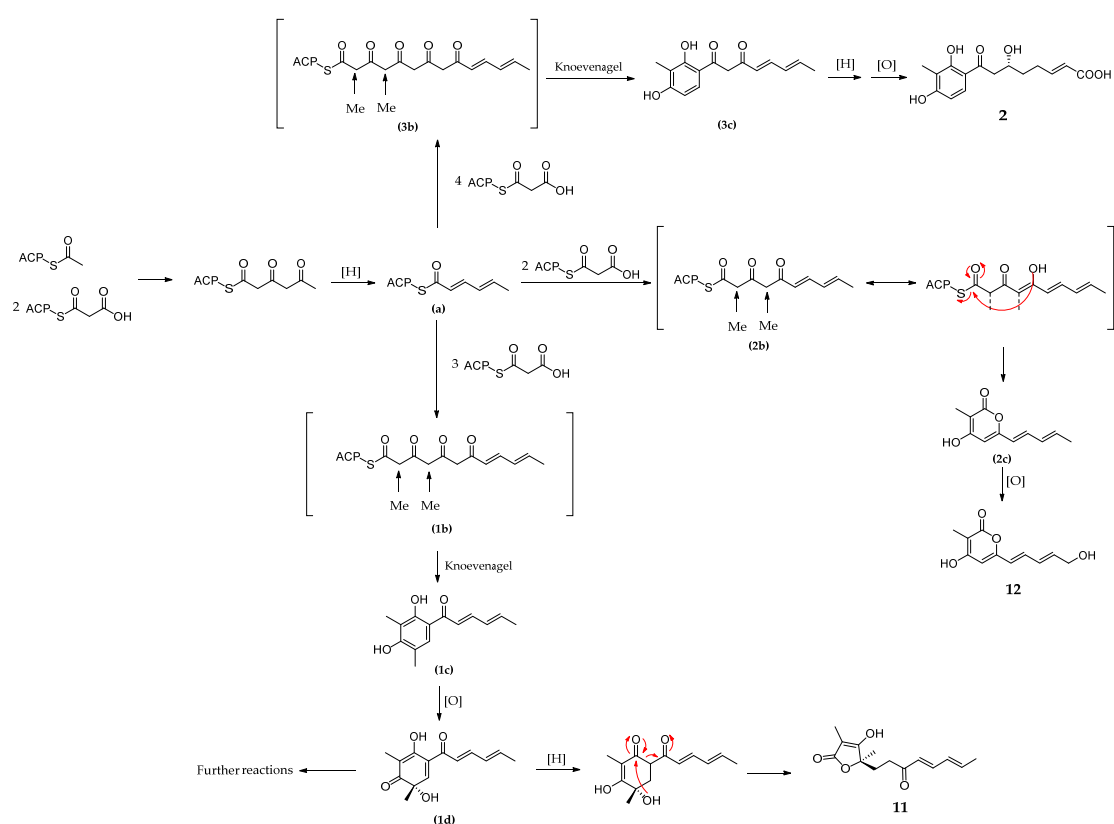

**Fig.S38.** Biosynthesis pathway of isolated mono-sorbicillinoids

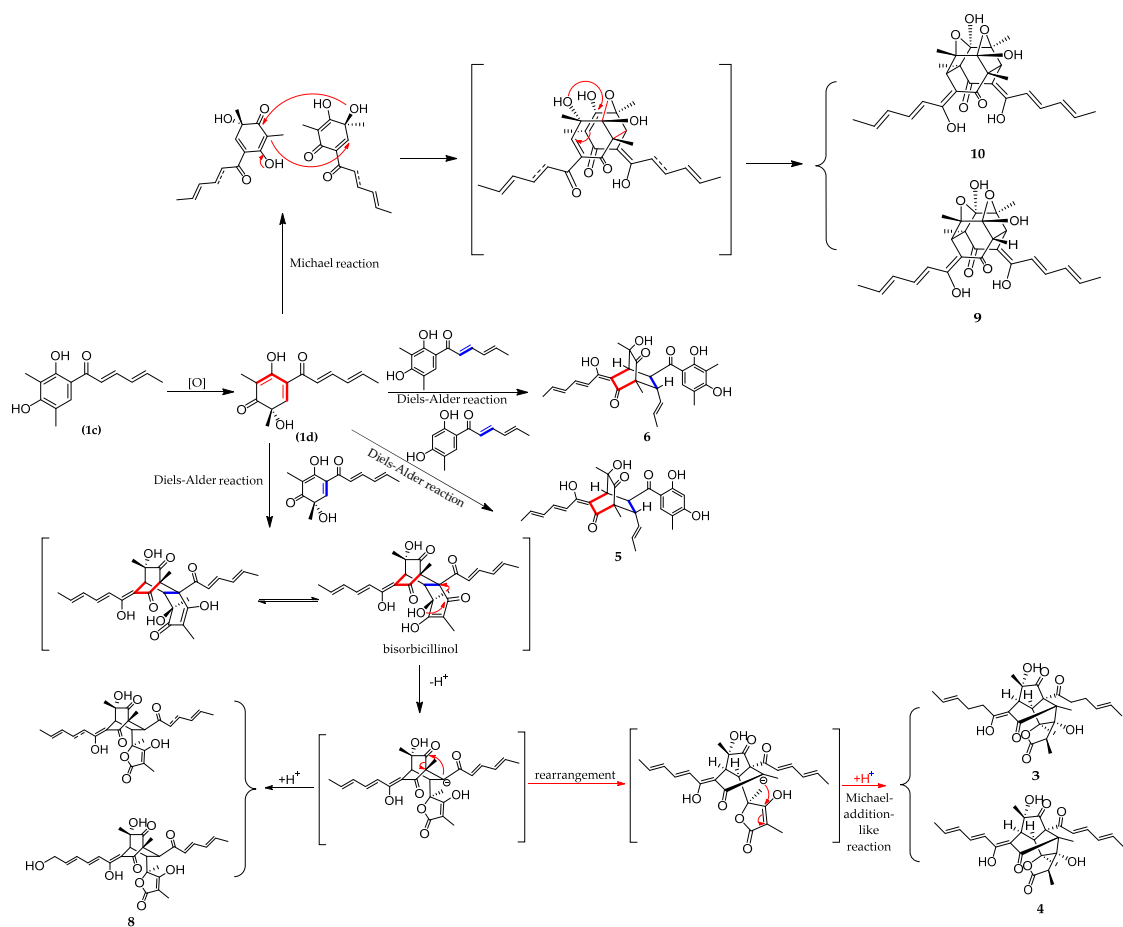

**Fig.S39.** Biosynthesis pathway of isolated dimeric sorbicillinoids

ECD calculations data of **1**

Conformation 1 of compound **1** (Boltzmann distribution: 0.425)

| Atom | x           | y           | z           |
|------|-------------|-------------|-------------|
| O    | 0.73379400  | 0.65194200  | 1.91618200  |
| C    | 1.06066500  | -0.58500300 | 1.51789600  |
| C    | 1.16091800  | -0.59702300 | -0.02829800 |
| C    | 2.60483100  | -0.16210800 | -0.36035600 |
| C    | 2.97894100  | 1.12422800  | -0.12741800 |
| C    | 1.97022800  | 2.08101600  | 0.41196300  |
| C    | 0.55716000  | 1.53169700  | 0.72230200  |
| O    | 1.25960400  | -1.50384100 | 2.28732100  |
| C    | 4.34066800  | 1.72502300  | -0.36043900 |
| O    | 2.23969700  | 3.25871500  | 0.60804400  |
| C    | -0.42557400 | 2.61594500  | 1.09748200  |
| C    | 0.16926500  | 0.53379300  | -0.39508900 |
| C    | -1.29439400 | 0.08197700  | -0.39833100 |

|   |             |             |             |
|---|-------------|-------------|-------------|
| C | -2.21573500 | 1.00811500  | -1.19379400 |
| C | -3.66851600 | 0.83961100  | -1.09845200 |
| C | -4.31306500 | -0.08541700 | -0.34303100 |
| C | -5.75152500 | -0.22825300 | -0.29105300 |
| H | 0.41361200  | 0.95179500  | -1.37388900 |
| O | -1.74358400 | 1.87095800  | -1.94287600 |
| C | -6.36885600 | -1.16010100 | 0.46705500  |
| C | -7.84820000 | -1.35343400 | 0.56079200  |
| O | 0.79225700  | -1.83176800 | -0.59088800 |
| C | 3.92829600  | -2.36217700 | 0.02249700  |
| C | 3.53798700  | -1.21982700 | -0.93983400 |
| O | 3.03810500  | -1.70273900 | -2.19416800 |
| O | 2.82928500  | -3.13992000 | 0.53047800  |
| H | 4.77286200  | 2.05561400  | 0.59038300  |
| H | 5.04116500  | 1.03607900  | -0.82894300 |
| H | 4.25317500  | 2.61419200  | -0.99188800 |
| H | -1.37703600 | 2.18081700  | 1.40964400  |
| H | -0.02637500 | 3.21773400  | 1.91586200  |
| H | -0.59928500 | 3.26931100  | 0.24001700  |
| H | -1.34827800 | -0.90471300 | -0.87299800 |
| H | -1.67821500 | -0.05583600 | 0.61722900  |
| H | -4.23999200 | 1.53077200  | -1.71480800 |
| H | -3.74160200 | -0.78011800 | 0.27028700  |
| H | -6.34575500 | 0.45491100  | -0.89734600 |
| H | -5.75278500 | -1.83312700 | 1.06463100  |
| H | -8.18760200 | -1.23666100 | 1.59801700  |
| H | -8.39414000 | -0.64360500 | -0.06693800 |
| H | -8.12445800 | -2.37206200 | 0.25968400  |
| H | 1.35448000  | -2.53341600 | -0.18047300 |
| H | 4.56566700  | -3.04854200 | -0.54162300 |
| H | 4.51016300  | -1.94840300 | 0.85259200  |
| H | 4.48829300  | -0.74550300 | -1.18712800 |
| H | 2.10519900  | -1.94807100 | -2.07217500 |
| H | 2.57908700  | -2.81630900 | 1.41378100  |

Conformation 2 of compound **1** (Boltzmann distribution: 0.353)

| Atom | x          | y           | z           |
|------|------------|-------------|-------------|
| O    | 1.10361000 | 0.85960500  | 1.92764600  |
| C    | 1.65405600 | -0.33172700 | 1.65709300  |
| C    | 1.47453400 | -0.62898600 | 0.14682900  |
| C    | 2.67598100 | 0.03219200  | -0.56190900 |
| C    | 2.74760100 | 1.38887600  | -0.61820400 |
| C    | 1.64838300 | 2.19332900  | -0.01107300 |
| C    | 0.49891000 | 1.42477200  | 0.68467800  |



|   |             |             |             |
|---|-------------|-------------|-------------|
| O | 2.21113500  | -1.01487300 | 2.49292800  |
| C | 3.84698400  | 2.20934500  | -1.24111600 |
| O | 1.64610200  | 3.41661600  | -0.05246300 |
| C | -0.64096700 | 2.32419800  | 1.10225400  |
| C | 0.18039300  | 0.16430800  | -0.15481200 |
| C | -1.09906500 | -0.57897800 | 0.23494800  |
| C | -2.35821700 | -0.05266500 | -0.44940000 |
| C | -3.63193700 | -0.54492900 | 0.09623400  |
| C | -4.83006700 | -0.18195600 | -0.42526400 |
| C | -6.11288600 | -0.62765100 | 0.06704000  |
| H | 0.12961500  | 0.42193800  | -1.21514700 |
| O | -2.28851600 | 0.70831600  | -1.41898100 |
| C | -7.28296900 | -0.23902300 | -0.48565500 |
| C | -8.63885800 | -0.66438200 | -0.02247400 |
| O | 1.33496900  | -2.00129300 | -0.12635900 |
| C | 4.56315000  | -1.69766800 | -0.14430500 |
| C | 3.72925800  | -0.89177200 | -1.16267700 |
| O | 3.15755300  | -1.71954000 | -2.18461500 |
| O | 3.80822300  | -2.58599200 | 0.69956200  |
| H | 3.41714200  | 2.95641100  | -1.91435200 |
| H | 4.39205700  | 2.76019100  | -0.46634000 |
| H | 4.56542300  | 1.61271300  | -1.80077900 |
| H | -1.38240200 | 1.76366400  | 1.67483700  |
| H | -0.26558100 | 3.14453700  | 1.71661000  |
| H | -1.12204200 | 2.74722200  | 0.21789900  |
| H | -1.00025200 | -1.62882100 | -0.07020200 |
| H | -1.25490300 | -0.60766400 | 1.31938300  |
| H | -3.58609000 | -1.21887900 | 0.94858800  |
| H | -4.83119600 | 0.49716500  | -1.27741800 |
| H | -6.11867000 | -1.30506000 | 0.92073600  |
| H | -7.25175000 | 0.43903400  | -1.33936400 |
| H | -9.18283800 | -1.16839000 | -0.83166000 |
| H | -8.58451300 | -1.34021700 | 0.83557300  |
| H | -9.24291900 | 0.20851800  | 0.25655900  |
| H | 2.11987000  | -2.46795400 | 0.25135600  |
| H | 5.25207200  | -2.32109900 | -0.72096800 |
| H | 5.14913300  | -1.00425500 | 0.46787800  |
| H | 4.46679400  | -0.28097900 | -1.68423700 |
| H | 2.35392900  | -2.13187300 | -1.82475400 |
| H | 3.64680600  | -2.16260800 | 1.56091800  |

Conformation 3 of compound **1** (Boltzmann distribution: 0.143)

| Atom | x           | y           | z          |
|------|-------------|-------------|------------|
| O    | -1.96158700 | -1.35112700 | 1.67834000 |

|   |             |             |             |
|---|-------------|-------------|-------------|
| C | -1.48169900 | -0.10111400 | 1.70551400  |
| C | -0.94083900 | 0.25671900  | 0.29686100  |
| C | -2.15031100 | 0.79345500  | -0.49630200 |
| C | -3.13758000 | -0.07011700 | -0.85481200 |
| C | -3.00119000 | -1.51168400 | -0.49529300 |
| C | -1.75312300 | -1.93288400 | 0.32022100  |
| O | -1.51238500 | 0.60468200  | 2.69391200  |
| C | -4.40122200 | 0.26478100  | -1.60331500 |
| O | -3.83952200 | -2.33984400 | -0.82576600 |
| C | -1.62702700 | -3.43005100 | 0.47755600  |
| C | -0.54179500 | -1.14374600 | -0.22636100 |
| C | 0.83356400  | -1.60784400 | 0.26243200  |
| C | 1.98508800  | -1.00807000 | -0.54677500 |
| C | 3.25669900  | -0.81671800 | 0.16562000  |
| C | 4.36815400  | -0.34876400 | -0.45522700 |
| C | 5.64477300  | -0.13666500 | 0.18646600  |
| H | -0.54366600 | -1.15638400 | -1.31909900 |
| O | 1.84155000  | -0.76333700 | -1.74801100 |
| C | 6.72378300  | 0.34001700  | -0.47258700 |
| C | 8.06804500  | 0.58228800  | 0.13422300  |
| O | 0.15598000  | 1.13479200  | 0.34640500  |
| C | -2.32023600 | 3.23438000  | 0.36642900  |
| C | -2.16024600 | 2.27971400  | -0.83641600 |
| O | -1.03577400 | 2.61739300  | -1.65967100 |
| O | -1.29505100 | 3.13210500  | 1.37082400  |
| H | -4.50430300 | -0.39054500 | -2.47321300 |
| H | -5.27436900 | 0.08282100  | -0.96705500 |
| H | -4.43977600 | 1.29845900  | -1.94255100 |
| H | -2.57181600 | -3.85409400 | 0.82186200  |
| H | -1.37929500 | -3.88558600 | -0.48520200 |
| H | -0.84391500 | -3.67375100 | 1.19789500  |
| H | 0.98211800  | -1.41999200 | 1.32974400  |
| H | 0.91832200  | -2.69346100 | 0.12394500  |
| H | 3.28265700  | -1.06326100 | 1.22428400  |
| H | 4.29785700  | -0.11087200 | -1.51632000 |
| H | 5.72300100  | -0.37509900 | 1.24700000  |
| H | 6.62086300  | 0.57213300  | -1.53328500 |
| H | 8.35926800  | 1.63435000  | 0.01988300  |
| H | 8.08886700  | 0.32794700  | 1.19763000  |
| H | 8.83667500  | -0.00696600 | -0.38225500 |
| H | -0.11965900 | 1.93660800  | 0.85328400  |
| H | -2.27352500 | 4.25286900  | -0.02872000 |
| H | -3.30535800 | 3.08034700  | 0.81898300  |
| H | -3.03013800 | 2.48757100  | -1.46032400 |

|   |             |            |             |
|---|-------------|------------|-------------|
| H | -0.23586800 | 2.25684000 | -1.24047500 |
| H | -1.60265100 | 2.56056700 | 2.09630800  |

Conformation 4 of compound **1** (Boltzmann distribution: 0.030)

| Atom | x           | y           | z           |
|------|-------------|-------------|-------------|
| O    | 0.70156100  | 1.11372300  | 1.48179700  |
| C    | 0.84908400  | -0.20215300 | 1.27791700  |
| C    | 1.15158500  | -0.43793200 | -0.22396500 |
| C    | 2.68639500  | -0.26760300 | -0.34037300 |
| C    | 3.22738600  | 0.97154400  | -0.19085100 |
| C    | 2.32077200  | 2.13550500  | 0.05131900  |
| C    | 0.80789600  | 1.83529000  | 0.18768400  |
| O    | 0.86580100  | -1.01793700 | 2.18033900  |
| C    | 4.68992900  | 1.32952800  | -0.24613700 |
| O    | 2.74820600  | 3.27811100  | 0.14826500  |
| C    | -0.04883600 | 3.07638200  | 0.26489200  |
| C    | 0.46263100  | 0.77542600  | -0.88760200 |
| C    | -0.99887200 | 0.60716500  | -1.32680700 |
| C    | -2.05112500 | 0.15399200  | -0.32801200 |
| C    | -3.43956900 | 0.19844500  | -0.81365900 |
| C    | -4.48712900 | -0.16668200 | -0.03399300 |
| C    | -5.87158400 | -0.13940900 | -0.44577000 |
| H    | 1.00867200  | 1.02952300  | -1.80098100 |
| O    | -1.74851000 | -0.23959000 | 0.80205800  |
| C    | -6.88436900 | -0.50382600 | 0.37091400  |
| C    | -8.33350400 | -0.49621600 | 0.00483100  |
| O    | 0.67154200  | -1.66099600 | -0.72308700 |
| C    | 3.53895700  | -2.56592500 | 0.50971000  |
| C    | 3.50791200  | -1.51952700 | -0.62528700 |
| O    | 3.13829400  | -2.08941100 | -1.88907900 |
| O    | 2.26032300  | -3.09220300 | 0.90124000  |
| H    | 4.84784400  | 2.14487400  | -0.95826900 |
| H    | 5.02492600  | 1.69615400  | 0.73059700  |
| H    | 5.32775600  | 0.49439800  | -0.53062500 |
| H    | -1.08782500 | 2.80987000  | 0.46853300  |
| H    | 0.31094300  | 3.73711300  | 1.05588400  |
| H    | -0.00118100 | 3.62132800  | -0.68164700 |
| H    | -1.33623700 | 1.54541400  | -1.78306600 |
| H    | -1.01576200 | -0.12207300 | -2.14785100 |
| H    | -3.60648200 | 0.54517100  | -1.83077700 |
| H    | -4.27452600 | -0.50291400 | 0.98052400  |
| H    | -6.09038800 | 0.19297000  | -1.46034400 |
| H    | -6.64114900 | -0.83212500 | 1.38218000  |
| H    | -8.89966000 | 0.15488800  | 0.68325600  |

|   |             |             |             |
|---|-------------|-------------|-------------|
| H | -8.49474600 | -0.15525300 | -1.02170500 |
| H | -8.76409400 | -1.50009700 | 0.11214500  |
| H | 1.02101500  | -2.38316500 | -0.14872400 |
| H | 4.12822500  | -3.41155600 | 0.14448500  |
| H | 4.04946200  | -2.13488500 | 1.37788700  |
| H | 4.55185700  | -1.22962400 | -0.74985300 |
| H | 2.16943500  | -2.17018400 | -1.90882900 |
| H | 1.90882600  | -2.56743000 | 1.64604800  |

Conformation 5 of compound **1** (Boltzmann distribution: 0.012)

| Atom | x           | y           | z           |
|------|-------------|-------------|-------------|
| O    | 0.94061100  | 0.73195100  | 1.94977600  |
| C    | 1.42807900  | -0.47284700 | 1.62269000  |
| C    | 1.35961100  | -0.63407600 | 0.08300200  |
| C    | 2.66257100  | -0.01442600 | -0.46625900 |
| C    | 2.83741000  | 1.33185100  | -0.39187700 |
| C    | 1.74612100  | 2.16888300  | 0.18387700  |
| C    | 0.48838800  | 1.43987600  | 0.71486300  |
| O    | 1.86220600  | -1.26151000 | 2.43813900  |
| C    | 4.04443300  | 2.11272600  | -0.84187300 |
| O    | 1.83179100  | 3.38850200  | 0.24178300  |
| C    | -0.61815900 | 2.38833100  | 1.11257800  |
| C    | 0.15463300  | 0.27738300  | -0.25116500 |
| C    | -1.20027000 | -0.39572400 | -0.02090100 |
| C    | -2.36179800 | 0.26963800  | -0.75498700 |
| C    | -3.70581900 | -0.15677100 | -0.33313000 |
| C    | -4.82436000 | 0.34185600  | -0.91431000 |
| C    | -6.21435300 | 0.02467200  | -0.61473200 |
| H    | 0.20901400  | 0.61948700  | -1.28727500 |
| O    | -2.16208000 | 1.08255600  | -1.66193100 |
| C    | -6.65244400 | -0.90818000 | 0.25747900  |
| C    | -8.09126100 | -1.20331100 | 0.53717700  |
| O    | 1.14621000  | -1.96513800 | -0.31711400 |
| C    | 4.37778200  | -1.92263800 | -0.07308700 |
| C    | 3.68992700  | -0.96627600 | -1.07039400 |
| O    | 3.13953800  | -1.65415400 | -2.20182200 |
| O    | 3.49346900  | -2.80228200 | 0.64460200  |
| H    | 3.74064400  | 2.90473300  | -1.53290400 |
| H    | 4.51230200  | 2.60690600  | 0.01659200  |
| H    | 4.79866500  | 1.49846900  | -1.33052500 |
| H    | -1.44171300 | 1.84338400  | 1.57799700  |
| H    | -0.24135100 | 3.13051500  | 1.81868800  |

|   |             |             |             |
|---|-------------|-------------|-------------|
| H | -0.99299100 | 2.91043300  | 0.22973100  |
| H | -1.14754000 | -1.42492600 | -0.39891000 |
| H | -1.44402500 | -0.49092200 | 1.04329300  |
| H | -3.75961100 | -0.88432700 | 0.47231500  |
| H | -4.66966400 | 1.07802000  | -1.70171000 |
| H | -6.95467200 | 0.60301800  | -1.16520300 |
| H | -5.92800600 | -1.50699500 | 0.80924800  |
| H | -8.31515400 | -1.05455900 | 1.60154900  |
| H | -8.76077700 | -0.57057200 | -0.05224500 |
| H | -8.31979000 | -2.25468600 | 0.31983900  |
| H | 1.85980100  | -2.52048500 | 0.08083400  |
| H | 5.04888200  | -2.55933700 | -0.65613500 |
| H | 4.97753300  | -1.33718100 | 0.63141700  |
| H | 4.50944400  | -0.37577900 | -1.48146600 |
| H | 2.28313400  | -2.03178200 | -1.93823200 |
| H | 3.29895900  | -2.42861900 | 1.52193800  |

#### ECD calculations data of **3**

Conformation 1 of compound **3** (Boltzmann distribution: 0.198)

| Atom | x           | y           | z           |
|------|-------------|-------------|-------------|
| C    | -7.05953000 | -2.88782300 | 2.25243000  |
| C    | -6.04519400 | -1.84124700 | 1.88502300  |
| C    | -5.82291500 | -1.37984100 | 0.64754400  |
| C    | -4.81295400 | -0.32306800 | 0.28945500  |
| C    | -3.73718800 | -0.86593900 | -0.68918200 |
| C    | -2.77207200 | 0.19489600  | -1.13399500 |
| C    | -1.39484600 | 0.18769800  | -0.93525700 |
| O    | -3.36677000 | 1.20932400  | -1.74823900 |
| C    | -0.62743600 | 1.32957400  | -1.37511300 |
| C    | -0.63625200 | -1.01178500 | -0.38602600 |
| C    | 0.68652700  | -0.57868900 | 0.31329000  |
| C    | 1.48237700  | 0.00175800  | -0.90148600 |
| C    | 0.99412800  | -0.85395200 | -2.09859800 |
| C    | -0.10547300 | -1.82953100 | -1.59322800 |
| C    | 0.86092800  | 1.46957300  | -0.95347900 |
| O    | -1.14476200 | 2.26013400  | -2.04499000 |
| C    | 0.60846500  | 0.55694700  | 1.36092800  |
| C    | 3.01070000  | -0.12774100 | -0.74020700 |
| C    | 3.65152300  | -1.44431600 | -1.12636000 |
| O    | 3.69964300  | 0.78693300  | -0.29767000 |
| C    | 5.01571300  | -1.71399700 | -0.46703500 |
| C    | 4.91748300  | -2.07466800 | 0.99324600  |
| C    | 5.55213800  | -1.44509000 | 1.99011900  |
| C    | 5.47562200  | -1.82177100 | 3.44325800  |

|   |             |             |             |
|---|-------------|-------------|-------------|
| O | 1.40986300  | -0.77180200 | -3.23535900 |
| C | -1.08915800 | -2.26133100 | -2.66788800 |
| O | 0.58429900  | -2.97028100 | -1.04856500 |
| C | 1.57090500  | 2.43777300  | -1.90420300 |
| C | 0.88853100  | 1.91458200  | 0.58968600  |
| O | -0.76421900 | 0.67276800  | 1.86489600  |
| C | -0.19309800 | 2.84919200  | 1.18463100  |
| C | -1.26974300 | 1.91838700  | 1.69707400  |
| O | -2.41456800 | 2.18146600  | 2.00245600  |
| C | 1.50647400  | 0.31003400  | 2.56548100  |
| O | 2.11522100  | 2.52735100  | 0.91258200  |
| C | -0.66539800 | 4.11061100  | 0.46272600  |
| H | 1.15640500  | -1.46505300 | 0.74098300  |
| H | -1.24207000 | -1.62897600 | 0.27669100  |
| H | -7.60496100 | -3.24642100 | 1.37359800  |
| H | -6.58021900 | -3.74976700 | 2.73388000  |
| H | -7.78941800 | -2.49476400 | 2.97164300  |
| H | -5.45547900 | -1.43323100 | 2.70828800  |
| H | -6.40747300 | -1.78607100 | -0.18107000 |
| H | -5.31508300 | 0.52611600  | -0.18919600 |
| H | -4.32563700 | 0.05607200  | 1.19411000  |
| H | -3.21511500 | -1.70442500 | -0.22874500 |
| H | -4.23727500 | -1.24875700 | -1.58859200 |
| H | -2.62798100 | 1.84634500  | -2.02822300 |
| H | 2.94955900  | -2.26274900 | -0.93108400 |
| H | 3.76432000  | -1.40915800 | -2.21914800 |
| H | 5.47107500  | -2.54936600 | -1.01528500 |
| H | 5.67188700  | -0.84860700 | -0.60130300 |
| H | 4.28228800  | -2.93141200 | 1.23077100  |
| H | 6.18366700  | -0.58827500 | 1.74775400  |
| H | 6.46922400  | -2.06558200 | 3.84058700  |
| H | 5.09390800  | -0.98894300 | 4.04760000  |
| H | 4.82314100  | -2.68650100 | 3.60148900  |
| H | -1.83838200 | -2.93521400 | -2.24381000 |
| H | -0.55442300 | -2.79056200 | -3.46312600 |
| H | -1.59306600 | -1.40887100 | -3.12654800 |
| H | 0.81560800  | -3.57243800 | -1.77172600 |
| H | 1.50721600  | 2.06606700  | -2.93069600 |
| H | 1.09569800  | 3.41883100  | -1.87376100 |
| H | 2.62197400  | 2.55400600  | -1.64546400 |
| H | 0.29191600  | 3.18777800  | 2.11355600  |
| H | 1.48602800  | 1.16136400  | 3.25011900  |
| H | 1.15856100  | -0.58120300 | 3.09597200  |
| H | 2.54164500  | 0.14376200  | 2.25770300  |

|   |             |            |             |
|---|-------------|------------|-------------|
| H | 2.84442700  | 2.01374900 | 0.50091400  |
| H | -1.32537200 | 4.67610700 | 1.12637100  |
| H | 0.19500200  | 4.74289600 | 0.22741000  |
| H | -1.20278000 | 3.89468300 | -0.45954700 |

Conformation 2 of compound **3** (Boltzmann distribution: 0.093)

| Atom | x           | y           | z           |
|------|-------------|-------------|-------------|
| C    | -7.84853400 | -2.11457300 | 2.08676900  |
| C    | -6.93323800 | -1.18996800 | 1.33418700  |
| C    | -5.59906500 | -1.15970700 | 1.44639000  |
| C    | -4.69299100 | -0.22166000 | 0.69452400  |
| C    | -3.70595100 | -0.98961000 | -0.22608100 |
| C    | -2.76749300 | -0.07122600 | -0.95438800 |
| C    | -1.38296300 | -0.03722900 | -0.82107400 |
| O    | -3.39654100 | 0.77275800  | -1.76186300 |
| C    | -0.64323000 | 0.96473500  | -1.55310200 |
| C    | -0.59560100 | -1.07486700 | -0.03417300 |
| C    | 0.75738800  | -0.49761500 | 0.47640700  |
| C    | 1.49097900  | -0.22935200 | -0.87852400 |
| C    | 0.94988500  | -1.34582700 | -1.80968300 |
| C    | -0.11878800 | -2.16403800 | -1.03121400 |
| C    | 0.86319900  | 1.18864300  | -1.24910800 |
| O    | -1.19657400 | 1.71447900  | -2.39772300 |
| C    | 0.72674900  | 0.85503600  | 1.22553900  |
| C    | 3.02618200  | -0.32962300 | -0.76466700 |
| C    | 3.64948800  | -1.70704900 | -0.84810000 |
| O    | 3.73458000  | 0.65865900  | -0.59610200 |
| C    | 5.04391500  | -1.82436000 | -0.20682400 |
| C    | 5.01584600  | -1.81813000 | 1.30030100  |
| C    | 5.69818600  | -0.97328900 | 2.08359800  |
| C    | 5.69156400  | -0.98469300 | 3.58666500  |
| O    | 1.30973800  | -1.54278700 | -2.95130200 |
| C    | -1.14837900 | -2.84200200 | -1.91987800 |
| O    | 0.60297200  | -3.14268100 | -0.25937400 |
| C    | 1.52264700  | 1.89337500  | -2.43816900 |
| C    | 0.96608000  | 1.98749200  | 0.14011000  |
| O    | -0.62167100 | 1.09978100  | 1.74993100  |
| C    | -0.08539800 | 3.04798500  | 0.54853800  |

|   |             |             |             |
|---|-------------|-------------|-------------|
| C | -1.13423300 | 2.27761400  | 1.31951300  |
| O | -2.26200200 | 2.61941700  | 1.61041200  |
| C | 1.68071000  | 0.89451300  | 2.41111600  |
| O | 2.20625000  | 2.64758900  | 0.24864100  |
| C | -0.59590500 | 4.10632000  | -0.42870700 |
| H | 1.25160200  | -1.26025600 | 1.07902100  |
| H | -1.16780900 | -1.50713900 | 0.78607600  |
| H | -7.28981600 | -2.78781200 | 2.74485400  |
| H | -8.56179100 | -1.54978300 | 2.70064100  |
| H | -8.44537200 | -2.72553000 | 1.39765600  |
| H | -7.41527500 | -0.48972700 | 0.64898300  |
| H | -5.10974300 | -1.85772800 | 2.12937800  |
| H | -5.28652700 | 0.47323300  | 0.09241700  |
| H | -4.10780000 | 0.37988900  | 1.40192600  |
| H | -3.15465300 | -1.72515600 | 0.36019100  |
| H | -4.28159600 | -1.53973600 | -0.98064000 |
| H | -2.67564400 | 1.32329800  | -2.21668700 |
| H | 2.95816700  | -2.44660000 | -0.42883200 |
| H | 3.71157400  | -1.93867600 | -1.92081400 |
| H | 5.47193600  | -2.77325900 | -0.55613500 |
| H | 5.69276100  | -1.02527000 | -0.57816900 |
| H | 4.39256900  | -2.58378500 | 1.76840700  |
| H | 6.31875500  | -0.20938600 | 1.61131600  |
| H | 5.34180800  | -0.02466500 | 3.98732300  |
| H | 5.04546000  | -1.77565000 | 3.98091200  |
| H | 6.70279200  | -1.13872000 | 3.98448900  |
| H | -1.86113900 | -3.40177200 | -1.30847000 |
| H | -0.64503600 | -3.54122700 | -2.59553000 |
| H | -1.69219800 | -2.12625700 | -2.53848500 |
| H | 0.80264100  | -3.90297200 | -0.82578900 |
| H | 1.41791300  | 1.28045600  | -3.33781600 |
| H | 1.03994900  | 2.85239900  | -2.62896100 |
| H | 2.58290200  | 2.06724300  | -2.26344000 |
| H | 0.44681700  | 3.59228300  | 1.34443100  |
| H | 1.69020500  | 1.88490400  | 2.87239600  |
| H | 1.35982800  | 0.15911300  | 3.15472500  |
| H | 2.70052700  | 0.64991300  | 2.10464800  |
| H | 2.91600800  | 2.04690300  | -0.06815700 |
| H | -1.20891700 | 4.82944100  | 0.11624600  |
| H | 0.25169200  | 4.64391700  | -0.86241000 |
| H | -1.19289700 | 3.68501800  | -1.23645000 |

Conformation 3 of compound **3** (Boltzmann distribution: 0.093)

|      |   |   |   |
|------|---|---|---|
| Atom | x | y | z |
|------|---|---|---|



|   |             |             |             |
|---|-------------|-------------|-------------|
| C | 7.70880000  | -1.79517300 | -2.06000500 |
| C | 6.56229800  | -0.99149000 | -1.51364900 |
| C | 6.11641400  | -1.03665200 | -0.25146400 |
| C | 4.97371600  | -0.21919600 | 0.28732500  |
| C | 3.80951200  | -1.11758400 | 0.78802800  |
| C | 2.68892900  | -0.31731500 | 1.38597900  |
| C | 1.39141300  | -0.22792900 | 0.89195800  |
| O | 3.05835500  | 0.36139200  | 2.46456700  |
| C | 0.45914800  | 0.65627800  | 1.55425900  |
| C | 0.86975700  | -1.10043900 | -0.24219100 |
| C | -0.30640800 | -0.41061200 | -0.99313300 |
| C | -1.38308400 | -0.35507600 | 0.14283000  |
| C | -1.07387500 | -1.60922200 | 1.00011100  |
| C | 0.16292300  | -2.32650700 | 0.39536500  |
| C | -0.90981400 | 0.97165800  | 0.89182400  |
| O | 0.74508900  | 1.23605800  | 2.63276700  |
| C | -0.09317000 | 1.04520300  | -1.47035100 |
| C | -2.83171400 | -0.39788400 | -0.39449100 |
| C | -3.45283200 | -1.75492600 | -0.63894800 |
| O | -3.44098200 | 0.62650700  | -0.68740500 |
| C | -4.81287600 | -1.73551900 | -1.35743900 |
| C | -5.97795400 | -1.38686400 | -0.46588800 |
| C | -6.88464900 | -0.43315300 | -0.71032000 |
| C | -8.06745000 | -0.11549700 | 0.16152800  |
| O | -1.69632300 | -1.96065900 | 1.98095200  |
| C | 0.93702800  | -3.18076900 | 1.38431700  |
| O | -0.33067700 | -3.13190700 | -0.69204400 |
| C | -1.88645200 | 1.49399900  | 1.94817900  |
| C | -0.63946200 | 1.99097400  | -0.32114000 |
| O | 1.34357400  | 1.33302000  | -1.55898000 |
| C | 0.46740000  | 3.06970600  | -0.23919800 |
| C | 1.70011600  | 2.40436400  | -0.80960300 |
| O | 2.85917800  | 2.75249600  | -0.71744300 |
| C | -0.68262500 | 1.30715200  | -2.84963700 |
| O | -1.81085300 | 2.69785500  | -0.65456100 |
| C | 0.66745000  | 3.93666700  | 1.00308400  |
| H | -0.60557000 | -1.04722500 | -1.82606700 |
| H | 1.65147700  | -1.40442300 | -0.93764400 |
| H | 7.38456700  | -2.42528500 | -2.89809400 |
| H | 8.49913400  | -1.14088700 | -2.44958300 |
| H | 8.14809800  | -2.44308700 | -1.29471600 |
| H | 6.06910900  | -0.31804200 | -2.21746300 |
| H | 6.60239500  | -1.71029700 | 0.45797800  |
| H | 5.31744100  | 0.39560400  | 1.12796600  |

|   |             |             |             |
|---|-------------|-------------|-------------|
| H | 4.60022100  | 0.46404200  | -0.48284500 |
| H | 3.45426400  | -1.74199300 | -0.03138500 |
| H | 4.18752000  | -1.78838300 | 1.57015400  |
| H | 2.23093800  | 0.84522400  | 2.79549600  |
| H | -2.71962500 | -2.34918300 | -1.20010900 |
| H | -3.54104000 | -2.26105300 | 0.33039800  |
| H | -4.77605300 | -1.05608100 | -2.21531300 |
| H | -4.96650200 | -2.74629400 | -1.75908200 |
| H | -6.08358100 | -1.99495200 | 0.43601100  |
| H | -6.77294200 | 0.17494900  | -1.61001800 |
| H | -8.03844200 | 0.92718800  | 0.50311200  |
| H | -9.00894200 | -0.23668300 | -0.38948500 |
| H | -8.10314600 | -0.76319100 | 1.04357500  |
| H | 1.77517600  | -3.66985900 | 0.88054900  |
| H | 0.27949300  | -3.95298000 | 1.79661900  |
| H | 1.31725100  | -2.59497700 | 2.22272400  |
| H | -0.68558300 | -3.95937400 | -0.33405300 |
| H | -2.02407100 | 0.74481900  | 2.73282400  |
| H | -1.49734300 | 2.39990300  | 2.41416400  |
| H | -2.85910800 | 1.72051800  | 1.51384400  |
| H | 0.16975100  | 3.75381200  | -1.04932000 |
| H | -1.74544500 | 1.05553500  | -2.87790300 |
| H | -0.57276200 | 2.35780800  | -3.12889300 |
| H | -0.16253300 | 0.68765300  | -3.58617900 |
| H | -2.55929300 | 2.06153900  | -0.69254700 |
| H | 1.39982000  | 4.71753600  | 0.78033200  |
| H | -0.27520700 | 4.42554500  | 1.26354600  |
| H | 1.01641400  | 3.36931700  | 1.86461600  |

Conformation 4 of compound **3** (Boltzmann distribution: 0.086)

| Atom | x           | y           | z           |
|------|-------------|-------------|-------------|
| C    | -6.67456400 | 3.98522300  | -1.87373100 |
| C    | -5.84571900 | 2.78219500  | -1.52035100 |
| C    | -5.56915800 | 2.37146800  | -0.27592800 |
| C    | -4.74664300 | 1.15978700  | 0.06995700  |
| C    | -3.47590000 | 1.54102500  | 0.87711800  |
| C    | -2.69124900 | 0.33860200  | 1.31423700  |
| C    | -1.39608800 | 0.01678700  | 0.91998700  |
| O    | -3.37266800 | -0.45307700 | 2.13179300  |
| C    | -0.81707400 | -1.21866300 | 1.39528900  |
| C    | -0.51468400 | 0.95549000  | 0.10834600  |
| C    | 0.55910800  | 0.16975800  | -0.69979100 |
| C    | 1.40862700  | -0.44305800 | 0.46324100  |
| C    | 1.29898300  | 0.61654900  | 1.58972200  |

|   |             |             |             |
|---|-------------|-------------|-------------|
| C | 0.36492500  | 1.75852400  | 1.10402600  |
| C | 0.52186800  | -1.72663400 | 0.79375000  |
| O | -1.39627400 | -1.93931700 | 2.24803200  |
| C | 0.08133500  | -1.02044800 | -1.56480700 |
| C | 2.88509700  | -0.66947900 | 0.07733400  |
| C | 3.84049100  | 0.49302800  | 0.22495500  |
| O | 3.28213400  | -1.73853800 | -0.37903600 |
| C | 5.16735900  | 0.31709400  | -0.53037700 |
| C | 6.10889300  | 1.46666400  | -0.28383000 |
| C | 6.57881600  | 2.29135300  | -1.22854400 |
| C | 7.52704200  | 3.43356000  | -0.99196400 |
| O | 1.85307500  | 0.55441600  | 2.66737000  |
| C | -0.31405200 | 2.52333700  | 2.22749700  |
| O | 1.18112000  | 2.64287100  | 0.31277500  |
| C | 1.16898500  | -2.72708300 | 1.75548100  |
| C | 0.20437700  | -2.32104500 | -0.66488500 |
| O | -1.35064900 | -0.88195400 | -1.85225200 |
| C | -1.12699100 | -3.04936100 | -0.97099900 |
| C | -2.06344100 | -1.96165700 | -1.44817100 |
| O | -3.27209400 | -1.99520400 | -1.55282200 |
| C | 0.80064300  | -1.09944000 | -2.90432600 |
| O | 1.20918700  | -3.22001600 | -1.07213600 |
| C | -1.71416900 | -4.09875600 | -0.02787700 |
| H | 1.12433500  | 0.88125600  | -1.30219900 |
| H | -1.08484700 | 1.61681200  | -0.54368800 |
| H | -7.03173000 | 4.50541300  | -0.97913600 |
| H | -6.09783900 | 4.69750000  | -2.47749900 |
| H | -7.54694500 | 3.70051800  | -2.47567000 |
| H | -5.45018500 | 2.20741800  | -2.36011100 |
| H | -5.95933500 | 2.94331300  | 0.56905200  |
| H | -5.34177900 | 0.46553300  | 0.67540100  |
| H | -4.45342600 | 0.62704400  | -0.84097600 |
| H | -2.85977400 | 2.21980400  | 0.28799100  |
| H | -3.77897600 | 2.07943900  | 1.78432200  |
| H | -2.74616900 | -1.21086800 | 2.38331400  |
| H | 3.32921200  | 1.41371100  | -0.08104400 |
| H | 4.02818100  | 0.61065200  | 1.30134400  |
| H | 5.63189300  | -0.62159200 | -0.20481400 |
| H | 4.97018600  | 0.21724600  | -1.60368600 |
| H | 6.42050400  | 1.61880500  | 0.75210400  |
| H | 6.26277900  | 2.13512600  | -2.26195500 |
| H | 7.08885500  | 4.38491300  | -1.31963800 |
| H | 7.79112200  | 3.52533600  | 0.06650500  |
| H | 8.45342900  | 3.30286900  | -1.56578000 |

|   |             |             |             |
|---|-------------|-------------|-------------|
| H | -0.95395400 | 3.30832300  | 1.81573600  |
| H | 0.44655000  | 2.99104200  | 2.86122200  |
| H | -0.91292900 | 1.87169100  | 2.86596200  |
| H | 1.65411600  | 3.24630900  | 0.90512900  |
| H | 1.35630500  | -2.24956000 | 2.72129600  |
| H | 0.50595900  | -3.57633600 | 1.92415100  |
| H | 2.11535700  | -3.09990000 | 1.36692300  |
| H | -0.88028400 | -3.57760300 | -1.90529800 |
| H | 1.88360000  | -1.14274500 | -2.76585600 |
| H | 0.49308000  | -1.98618900 | -3.46365300 |
| H | 0.56432800  | -0.20827600 | -3.49311700 |
| H | 2.08572700  | -2.83163700 | -0.85766100 |
| H | -2.57271800 | -4.57358900 | -0.51078800 |
| H | -0.96759200 | -4.87357600 | 0.16632000  |
| H | -2.03860700 | -3.68056300 | 0.92385200  |

Conformation 5 of compound **3** (Boltzmann distribution: 0.084)

| Atom | x           | y           | z           |
|------|-------------|-------------|-------------|
| C    | 6.79364500  | -3.68104000 | -1.65445600 |
| C    | 5.85018400  | -2.52674500 | -1.46329300 |
| C    | 5.67849300  | -1.84784400 | -0.32159800 |
| C    | 4.74098400  | -0.68439800 | -0.14369200 |
| C    | 3.65257300  | -0.98078200 | 0.92390700  |
| C    | 2.76744700  | 0.20374000  | 1.18136100  |
| C    | 1.40420600  | 0.28392600  | 0.91408800  |
| O    | 3.42610000  | 1.23905700  | 1.68587100  |
| C    | 0.72339300  | 1.53293900  | 1.16630900  |
| C    | 0.56918000  | -0.91244700 | 0.47997600  |
| C    | -0.68514300 | -0.46748400 | -0.32992900 |
| C    | -1.47084400 | 0.32783900  | 0.76553900  |
| C    | -1.09177200 | -0.39684300 | 2.08350500  |
| C    | -0.07550300 | -1.52417800 | 1.75226900  |
| C    | -0.72915500 | 1.73596200  | 0.65707000  |
| O    | 1.29405300  | 2.49858700  | 1.73526300  |
| C    | -0.46427800 | 0.51156200  | -1.50740200 |
| C    | -2.99934400 | 0.30182300  | 0.55359300  |
| C    | -3.77575000 | -0.85454800 | 1.14413300  |
| O    | -3.58087900 | 1.16829400  | -0.09471000 |
| C    | -5.20209500 | -1.03230500 | 0.59353000  |
| C    | -5.25564800 | -1.53835600 | -0.82547800 |
| C    | -5.77578500 | -2.71659200 | -1.19349300 |
| C    | -5.84117200 | -3.23633300 | -2.60239200 |
| O    | -1.52030000 | -0.12114200 | 3.18465500  |
| C    | 0.82519200  | -1.90808400 | 2.91408600  |

|   |             |             |             |
|---|-------------|-------------|-------------|
| O | -0.85282400 | -2.65619600 | 1.31874100  |
| C | -1.39425900 | 2.87160800  | 1.43923400  |
| C | -0.65649000 | 1.97659600  | -0.92977900 |
| O | 0.93406300  | 0.44862600  | -1.94758600 |
| C | 0.52439500  | 2.73462800  | -1.58352600 |
| C | 1.53720400  | 1.66173200  | -1.91702600 |
| O | 2.71140200  | 1.79023800  | -2.19600300 |
| C | -1.32567400 | 0.18616100  | -2.71960800 |
| O | -1.81091400 | 2.63946400  | -1.38993000 |
| C | 1.07319000  | 4.03954200  | -1.00742600 |
| H | -1.21575500 | -1.35994000 | -0.66282000 |
| H | 1.14546900  | -1.65354400 | -0.07302400 |
| H | 6.25521000  | -4.58128000 | -1.97713700 |
| H | 7.53149400  | -3.46173300 | -2.43674600 |
| H | 7.33371000  | -3.91737000 | -0.73201900 |
| H | 5.27100600  | -2.22908900 | -2.33964300 |
| H | 6.25215000  | -2.14133600 | 0.56044900  |
| H | 5.30268000  | 0.20144500  | 0.17676600  |
| H | 4.25935400  | -0.43588600 | -1.09527800 |
| H | 3.06969100  | -1.84942900 | 0.61870900  |
| H | 4.14326900  | -1.23349700 | 1.87246400  |
| H | 2.73699800  | 1.96721000  | 1.84187100  |
| H | -3.18930800 | -1.77436300 | 1.03257600  |
| H | -3.81809000 | -0.66397800 | 2.22553300  |
| H | -5.72553000 | -1.73540700 | 1.25043900  |
| H | -5.72612300 | -0.07173100 | 0.66927200  |
| H | -4.84059900 | -0.88425700 | -1.59353700 |
| H | -6.19476500 | -3.36631600 | -0.42224400 |
| H | -5.30863800 | -4.19147300 | -2.69526600 |
| H | -6.87875300 | -3.42682700 | -2.90514700 |
| H | -5.40191400 | -2.52942600 | -3.31355900 |
| H | 1.50529100  | -2.70970400 | 2.61377200  |
| H | 0.21352600  | -2.26534900 | 3.74892500  |
| H | 1.40926500  | -1.06133500 | 3.27841400  |
| H | -1.16040200 | -3.14267000 | 2.09816300  |
| H | -1.40181000 | 2.63451000  | 2.50675700  |
| H | -0.84214300 | 3.80263000  | 1.30647100  |
| H | -2.42169500 | 3.03012100  | 1.11513900  |
| H | 0.10708100  | 2.98372000  | -2.57185700 |
| H | -2.38468800 | 0.16095800  | -2.45343900 |
| H | -1.19014500 | 0.93243600  | -3.50610300 |
| H | -1.04417400 | -0.79645500 | -3.10914900 |
| H | -2.59889000 | 2.22623300  | -0.97284700 |
| H | 1.80658500  | 4.45623200  | -1.70324900 |

|   |            |            |             |
|---|------------|------------|-------------|
| H | 0.26109800 | 4.76398900 | -0.90228800 |
| H | 1.55088200 | 3.90700600 | -0.03779700 |

Conformation 6 of compound **3** (Boltzmann distribution: 0.052)

| Atom | x           | y           | z           |
|------|-------------|-------------|-------------|
| C    | 7.11576100  | -2.87666600 | 0.06279700  |
| C    | 6.50199700  | -1.85152500 | -0.84945400 |
| C    | 5.69451700  | -0.85529000 | -0.46268400 |
| C    | 5.09629500  | 0.17202800  | -1.38946900 |
| C    | 3.55464200  | 0.14365500  | -1.45617900 |
| C    | 2.83688800  | 0.56756300  | -0.20074300 |
| C    | 1.50074700  | 0.28784400  | 0.07576600  |
| O    | 3.55244900  | 1.32552000  | 0.61362100  |
| C    | 0.89158800  | 0.90611500  | 1.22493600  |
| C    | 0.66432900  | -0.67442900 | -0.75321300 |
| C    | -0.84222600 | -0.27985900 | -0.72605000 |
| C    | -1.17484000 | -0.49872400 | 0.78686000  |
| C    | -0.24556100 | -1.67051800 | 1.19576000  |
| C    | 0.64678900  | -2.04312800 | -0.02152400 |
| C    | -0.65369300 | 0.88493600  | 1.38261800  |
| O    | 1.56974700  | 1.53773800  | 2.07805000  |
| C    | -1.20486100 | 1.19079200  | -1.03908500 |
| C    | -2.64922500 | -0.87803300 | 1.03428000  |
| C    | -3.04186800 | -2.33095200 | 0.86398800  |
| O    | -3.49497100 | -0.04403400 | 1.34421600  |
| C    | -4.53664100 | -2.56390000 | 0.57905100  |
| C    | -4.95000100 | -2.18145700 | -0.81906500 |
| C    | -5.92793600 | -1.32067700 | -1.12851500 |
| C    | -6.35888000 | -0.96033300 | -2.52271300 |
| O    | -0.22979500 | -2.20611400 | 2.28418200  |
| C    | 1.96993500  | -2.68618900 | 0.35708000  |
| O    | -0.13534100 | -2.93707800 | -0.83653300 |
| C    | -1.01966100 | 1.13927700  | 2.84781900  |
| C    | -1.26120700 | 1.95565300  | 0.35001900  |
| O    | -0.11025900 | 1.82266000  | -1.78562800 |
| C    | -0.51839100 | 3.27250900  | 0.01780200  |
| C    | 0.35982900  | 2.93213600  | -1.16598200 |
| O    | 1.31403500  | 3.54276000  | -1.60240900 |
| C    | -2.45862800 | 1.32036700  | -1.89279300 |
| O    | -2.55332300 | 2.35678100  | 0.74338300  |
| C    | 0.09990200  | 4.15125400  | 1.10415500  |
| H    | -1.38898000 | -0.95959200 | -1.38022800 |
| H    | 1.02281500  | -0.77204300 | -1.77780000 |
| H    | 6.81953200  | -2.71761900 | 1.10464100  |

|   |             |             |             |
|---|-------------|-------------|-------------|
| H | 6.81781300  | -3.89243000 | -0.22708500 |
| H | 8.21160200  | -2.84627500 | 0.01004700  |
| H | 6.75097700  | -1.94125400 | -1.90890700 |
| H | 5.44579700  | -0.75983400 | 0.59545100  |
| H | 5.41638900  | 1.17709800  | -1.09067400 |
| H | 5.46970400  | 0.00777500  | -2.40601300 |
| H | 3.22017900  | 0.83149100  | -2.24700600 |
| H | 3.21541900  | -0.84980700 | -1.75874600 |
| H | 2.94285700  | 1.55655000  | 1.39526700  |
| H | -2.41587500 | -2.79174700 | 0.09170800  |
| H | -2.75934600 | -2.82560200 | 1.80408100  |
| H | -4.72284000 | -3.63544500 | 0.73025500  |
| H | -5.14368500 | -2.02713000 | 1.31440900  |
| H | -4.40318000 | -2.67076200 | -1.62862600 |
| H | -6.47014800 | -0.83286400 | -0.31625000 |
| H | -7.41696400 | -1.20325600 | -2.68379300 |
| H | -6.25572500 | 0.11755400  | -2.70184400 |
| H | -5.76821200 | -1.49043400 | -3.27677600 |
| H | 2.53472600  | -2.94297900 | -0.54298200 |
| H | 1.78200600  | -3.60431000 | 0.92328000  |
| H | 2.57757000  | -2.03338800 | 0.98592100  |
| H | -0.05736600 | -3.83542900 | -0.48171200 |
| H | -0.56855100 | 0.37226700  | 3.48359400  |
| H | -0.63859900 | 2.10846400  | 3.17153500  |
| H | -2.09720700 | 1.12173300  | 3.00100000  |
| H | -1.32091900 | 3.86909700  | -0.44376600 |
| H | -2.73035400 | 2.36940900  | -2.03258100 |
| H | -2.27390000 | 0.86826600  | -2.87174800 |
| H | -3.30528700 | 0.80549100  | -1.43206300 |
| H | -3.05487000 | 1.56696300  | 1.04216500  |
| H | 0.45298700  | 5.08290600  | 0.65343400  |
| H | -0.66183200 | 4.40506700  | 1.84633800  |
| H | 0.93553100  | 3.67151000  | 1.61164700  |

Conformation 7 of compound **3** (Boltzmann distribution: 0.052)

| Atom | x          | y           | z           |
|------|------------|-------------|-------------|
| C    | 6.37262000 | 0.50359400  | -2.63299100 |
| C    | 6.13257300 | -0.55313500 | -1.59073100 |
| C    | 5.30222100 | -0.43732400 | -0.54553400 |
| C    | 5.08987900 | -1.51146000 | 0.48864900  |
| C    | 3.62809500 | -2.02256400 | 0.57354500  |
| C    | 2.66521700 | -1.09166500 | 1.25893100  |
| C    | 1.41247600 | -0.70935300 | 0.78459400  |
| O    | 3.10329300 | -0.66981100 | 2.43718800  |

|   |             |             |             |
|---|-------------|-------------|-------------|
| C | 0.59255200  | 0.14810800  | 1.61047900  |
| C | 0.81029900  | -1.24975600 | -0.50514100 |
| C | -0.25700900 | -0.27265400 | -1.08395800 |
| C | -1.34391200 | -0.33174300 | 0.04186000  |
| C | -1.20488900 | -1.76638900 | 0.61042900  |
| C | -0.05836200 | -2.48573200 | -0.14854600 |
| C | -0.73138300 | 0.74127300  | 1.05123700  |
| O | 0.94158000  | 0.48078600  | 2.77249400  |
| C | 0.12906000  | 1.21848400  | -1.24082500 |
| C | -2.78026800 | -0.09422600 | -0.48148700 |
| C | -3.52747600 | -1.27823600 | -1.05700400 |
| O | -3.28337900 | 1.02495300  | -0.50478800 |
| C | -4.90569700 | -0.95421200 | -1.65859000 |
| C | -5.99571900 | -0.78086100 | -0.63079900 |
| C | -6.81950300 | 0.27012800  | -0.53963500 |
| C | -7.92613500 | 0.42066700  | 0.46682500  |
| O | -1.87937000 | -2.23654600 | 1.50315000  |
| C | 0.57176700  | -3.63097600 | 0.62522200  |
| O | -0.62264500 | -2.96256900 | -1.38472000 |
| C | -1.65199200 | 1.12920800  | 2.21132800  |
| C | -0.33971100 | 1.95811700  | 0.08089900  |
| O | 1.59008800  | 1.35784100  | -1.26238600 |
| C | 0.86919500  | 2.87699700  | 0.38029500  |
| C | 2.03794000  | 2.21607400  | -0.31398500 |
| O | 3.22409800  | 2.41812800  | -0.15311400 |
| C | -0.39559300 | 1.82821300  | -2.53354800 |
| O | -1.42471400 | 2.83878600  | -0.09225700 |
| C | 1.13220000  | 3.45083200  | 1.77207100  |
| H | -0.61103800 | -0.67732200 | -2.03186400 |
| H | 1.56348000  | -1.49164400 | -1.25495700 |
| H | 5.77353300  | 1.39989900  | -2.44420500 |
| H | 7.42968700  | 0.79799500  | -2.66076400 |
| H | 6.12671100  | 0.13159400  | -3.63595800 |
| H | 6.69394100  | -1.48211000 | -1.71264800 |
| H | 4.73511800  | 0.48623500  | -0.41901300 |
| H | 5.72685700  | -2.37244200 | 0.25898800  |
| H | 5.38734800  | -1.15077100 | 1.48061700  |
| H | 3.27161100  | -2.29088500 | -0.42110900 |
| H | 3.62765100  | -2.94384200 | 1.17205300  |
| H | 2.34736800  | -0.12704700 | 2.84460300  |
| H | -2.86937300 | -1.73625100 | -1.80761500 |
| H | -3.62648300 | -2.03608200 | -0.27119200 |
| H | -4.84050200 | -0.06719500 | -2.29694800 |
| H | -5.16650400 | -1.79805800 | -2.31154300 |



|   |             |             |             |
|---|-------------|-------------|-------------|
| H | -6.11825500 | -1.60763900 | 0.07326500  |
| H | -6.69230800 | 1.09590400  | -1.24216200 |
| H | -7.98269400 | -0.44470700 | 1.13508600  |
| H | -7.78194100 | 1.31892700  | 1.08086100  |
| H | -8.89899000 | 0.53457100  | -0.02837800 |
| H | 1.36655100  | -4.09263800 | 0.03375500  |
| H | -0.18936500 | -4.38886100 | 0.83791400  |
| H | 0.97911400  | -3.30367300 | 1.58329400  |
| H | -1.08922800 | -3.79485100 | -1.21692600 |
| H | -1.87898800 | 0.24824100  | 2.81810700  |
| H | -1.16696700 | 1.86483900  | 2.85358100  |
| H | -2.58956000 | 1.54931100  | 1.85020500  |
| H | 0.65868700  | 3.73816000  | -0.27323100 |
| H | -0.16746800 | 2.89561600  | -2.58306600 |
| H | 0.07072100  | 1.32475200  | -3.38542600 |
| H | -1.47856300 | 1.70720600  | -2.61310500 |
| H | -2.24135800 | 2.31067800  | -0.23554700 |
| H | 1.94571300  | 4.17898200  | 1.71027600  |
| H | 0.24012200  | 3.97423400  | 2.12666300  |
| H | 1.40307700  | 2.68786800  | 2.50031300  |

Conformation 8 of compound **3** (Boltzmann distribution: 0.051)

| Atom | x           | y           | z           |
|------|-------------|-------------|-------------|
| C    | -7.47396400 | -2.87291300 | 1.81916500  |
| C    | -6.46888900 | -2.32184300 | 0.84682900  |
| C    | -6.03860100 | -1.05400400 | 0.81445500  |
| C    | -5.03960300 | -0.50506600 | -0.16830600 |
| C    | -3.77389500 | 0.03570100  | 0.54556900  |
| C    | -2.80182300 | 0.71439600  | -0.37643300 |
| C    | -1.44048200 | 0.44533900  | -0.47635500 |
| O    | -3.35683000 | 1.69161600  | -1.08203900 |
| C    | -0.62600300 | 1.31237400  | -1.29729300 |
| C    | -0.76566500 | -0.74942500 | 0.17952200  |
| C    | 0.72011000  | -0.44069300 | 0.53167500  |
| C    | 1.32768700  | -0.25674700 | -0.89794300 |
| C    | 0.49181900  | -1.22185700 | -1.77627000 |
| C    | -0.61437900 | -1.86136800 | -0.89280200 |
| C    | 0.92162900  | 1.25997000  | -1.17233700 |
| O    | -1.13202800 | 2.17085900  | -2.06384400 |
| C    | 1.01925200  | 0.86931300  | 1.29788400  |
| C    | 2.82336100  | -0.62656600 | -0.96886400 |
| C    | 3.17915400  | -2.08701100 | -1.15269300 |
| O    | 3.71000300  | 0.21602900  | -0.86539900 |
| C    | 4.59424400  | -2.46941500 | -0.68225300 |

|   |             |             |             |
|---|-------------|-------------|-------------|
| C | 4.73163700  | -2.52860200 | 0.81760200  |
| C | 5.61113100  | -1.82728300 | 1.54388500  |
| C | 5.76177500  | -1.90553100 | 3.03741900  |
| O | 0.67901500  | -1.43780300 | -2.95543400 |
| C | -1.84721000 | -2.29891200 | -1.66451200 |
| O | -0.00332800 | -2.98651700 | -0.23339400 |
| C | 1.55559100  | 1.87972800  | -2.42095100 |
| C | 1.32184900  | 1.98104300  | 0.20648000  |
| O | -0.19116400 | 1.32507000  | 1.99168400  |
| C | 0.52420300  | 3.19003100  | 0.75294200  |
| C | -0.54557500 | 2.58264700  | 1.63350000  |
| O | -1.56058400 | 3.09747100  | 2.05586400  |
| C | 2.10025100  | 0.69911800  | 2.35619700  |
| O | 2.66145500  | 2.41651100  | 0.17297700  |
| C | 0.09700000  | 4.35453500  | -0.13968900 |
| H | 1.13701600  | -1.29991300 | 1.05809100  |
| H | -1.30550600 | -1.11536900 | 1.05193800  |
| H | -7.81970500 | -2.10558900 | 2.51916100  |
| H | -8.34892900 | -3.27821300 | 1.29514900  |
| H | -7.04719700 | -3.70027900 | 2.40031100  |
| H | -6.07301200 | -3.02691900 | 0.11324500  |
| H | -6.42869600 | -0.34427200 | 1.54743100  |
| H | -4.75743400 | -1.28221100 | -0.88709600 |
| H | -5.48998400 | 0.31585900  | -0.73853900 |
| H | -4.08251800 | 0.79396200  | 1.27880800  |
| H | -3.29152200 | -0.76642600 | 1.10400300  |
| H | -2.62062000 | 2.08220400  | -1.65929100 |
| H | 2.42007600  | -2.71274300 | -0.67003100 |
| H | 3.07815100  | -2.28154900 | -2.22989300 |
| H | 4.81020600  | -3.45978100 | -1.10406000 |
| H | 5.32698900  | -1.77519800 | -1.10478700 |
| H | 4.05508100  | -3.21660600 | 1.33028700  |
| H | 6.28341200  | -1.13921300 | 1.02788800  |
| H | 5.60078700  | -0.92446000 | 3.50225400  |
| H | 5.05153400  | -2.61302700 | 3.47737500  |
| H | 6.77561200  | -2.22025800 | 3.31596800  |
| H | -2.57609300 | -2.74703700 | -0.98363600 |
| H | -1.56535800 | -3.04625900 | -2.41329600 |
| H | -2.31501300 | -1.46694500 | -2.19353500 |
| H | -0.00550600 | -3.74393700 | -0.83772000 |
| H | 1.23622100  | 1.33061100  | -3.31117200 |
| H | 1.23838900  | 2.91680000  | -2.53539900 |
| H | 2.64282700  | 1.85334400  | -2.37330000 |
| H | 1.23143500  | 3.60620300  | 1.48748200  |

|   |             |            |             |
|---|-------------|------------|-------------|
| H | 2.33897500  | 1.65417600 | 2.83042300  |
| H | 1.74552600  | 0.00192500 | 3.12092500  |
| H | 3.01684600  | 0.29344900 | 1.92168800  |
| H | 3.21524200  | 1.71180300 | -0.22864500 |
| H | -0.31855900 | 5.14972100 | 0.48538800  |
| H | 0.97047800  | 4.75814200 | -0.65891200 |
| H | -0.64908500 | 4.07035900 | -0.88035700 |

## ECD calculations data of **5**

Conformation 1 of compound **5** (Boltzmann distribution: 0.620)

| Atom | x           | y           | z           |
|------|-------------|-------------|-------------|
| C    | 1.38599200  | 0.56314500  | 0.50378600  |
| C    | 1.75634800  | 1.84410100  | -0.08827300 |
| C    | -0.02610600 | 0.55835400  | 1.05332900  |
| C    | -0.17715700 | 1.70760100  | 2.08043200  |
| C    | 0.06980200  | 3.02625300  | 1.31703700  |
| C    | 0.57325800  | 2.85456100  | -0.11077100 |
| C    | -1.03759400 | 0.83377600  | -0.11351600 |
| C    | -0.58901900 | 2.09771000  | -0.90620800 |
| C    | 0.78870400  | 1.58755500  | 3.26765900  |
| O    | -1.52888500 | 1.69729700  | 2.55486600  |
| O    | 2.85083600  | 2.16143700  | -0.56510400 |
| C    | 2.19602400  | -0.55254700 | 0.55378400  |
| O    | 1.67327600  | -1.63684100 | 1.18507000  |
| C    | 3.52707800  | -0.63611100 | -0.01290400 |
| C    | 4.39580900  | -1.66494200 | 0.17287900  |
| C    | 5.71185500  | -1.71744400 | -0.42426400 |
| C    | 6.57650500  | -2.73554100 | -0.22251100 |
| C    | 7.94527300  | -2.83213600 | -0.81690200 |
| C    | -1.18794800 | -0.39743000 | -1.00063100 |
| C    | -2.07797600 | -1.48904200 | -0.60784800 |
| O    | -0.51619300 | -0.47689700 | -2.05496000 |
| O    | -0.18244700 | 4.10473800  | 1.83195100  |
| C    | -1.76280900 | 2.98610400  | -1.22573600 |
| C    | -2.16444500 | 3.29010800  | -2.46637500 |
| C    | 0.96522100  | 4.17498600  | -0.76044800 |
| C    | -2.86993900 | -1.45906200 | 0.56869900  |
| C    | -3.70661400 | -2.49427600 | 0.95021200  |
| C    | -3.75805300 | -3.62985500 | 0.10195200  |
| C    | -3.00401500 | -3.70955800 | -1.06627800 |
| C    | -2.16374100 | -2.65276000 | -1.42802800 |

|   |             |             |             |
|---|-------------|-------------|-------------|
| C | -4.53821900 | -2.44137800 | 2.20704900  |
| O | -4.58477800 | -4.63781400 | 0.49022500  |
| O | -1.44942500 | -2.77594900 | -2.56407000 |
| C | -3.35205000 | 4.14409600  | -2.80728500 |
| H | -0.25202800 | -0.38595300 | 1.54851600  |
| H | -2.00122000 | 1.03897100  | 0.35514000  |
| H | -0.13086700 | 1.77504600  | -1.84551000 |
| H | 0.61878100  | 2.41568200  | 3.96219500  |
| H | 0.60087500  | 0.64421100  | 3.78904400  |
| H | 1.83556900  | 1.61259600  | 2.95484300  |
| H | -1.67930700 | 2.52156200  | 3.04347500  |
| H | 2.22995800  | -2.41796200 | 1.05830800  |
| H | 3.82374000  | 0.21676400  | -0.61073400 |
| H | 4.14343500  | -2.51156800 | 0.81307400  |
| H | 6.00094000  | -0.88483400 | -1.06510600 |
| H | 6.26779000  | -3.55964400 | 0.42196300  |
| H | 8.17757000  | -1.97026900 | -1.44895000 |
| H | 8.70583800  | -2.90183500 | -0.02849800 |
| H | 8.04304300  | -3.74405200 | -1.41991500 |
| H | -2.32526600 | 3.37814300  | -0.37591600 |
| H | -1.59811700 | 2.89325300  | -3.31073000 |
| H | 1.81850200  | 4.62032400  | -0.24318400 |
| H | 1.24646100  | 4.01511700  | -1.80458300 |
| H | 0.13354700  | 4.88058900  | -0.72811400 |
| H | -2.82481100 | -0.58874100 | 1.21401900  |
| H | -3.05592200 | -4.58464900 | -1.70725100 |
| H | -4.28775900 | -3.26316700 | 2.88736000  |
| H | -4.37541900 | -1.49892400 | 2.73583800  |
| H | -5.60755300 | -2.52865800 | 1.98383900  |
| H | -4.55336400 | -5.36933200 | -0.14402400 |
| H | -0.92223100 | -1.93180200 | -2.64547900 |
| H | -3.86323200 | 4.50313800  | -1.90857700 |
| H | -3.04989200 | 5.01478600  | -3.40287900 |
| H | -4.07523500 | 3.58583700  | -3.41504000 |

Conformation 2 of compound **5** (Boltzmann distribution: 0.239)

| Atom | x           | y          | z           |
|------|-------------|------------|-------------|
| C    | 1.37313900  | 0.61001400 | 0.55293700  |
| C    | 1.73009500  | 1.87808300 | -0.07466900 |
| C    | -0.05173200 | 0.59336700 | 1.06951500  |
| C    | -0.24273400 | 1.76232300 | 2.06769600  |
| C    | 0.00679200  | 3.06774200 | 1.28324400  |
| C    | 0.53493000  | 2.87338600 | -0.13169500 |
| C    | -1.04224100 | 0.82491700 | -0.12453300 |

|   |             |             |             |
|---|-------------|-------------|-------------|
| C | -0.60295900 | 2.08361300  | -0.93102500 |
| C | 0.69263800  | 1.67842600  | 3.28183700  |
| O | -1.60646200 | 1.74519700  | 2.50721900  |
| O | 2.82036200  | 2.19524100  | -0.56108700 |
| C | 2.20433000  | -0.48628600 | 0.66279800  |
| O | 1.66146800  | -1.58294800 | 1.25386500  |
| C | 3.57363400  | -0.53740800 | 0.19134500  |
| C | 4.35572500  | -1.64879400 | 0.16343500  |
| C | 5.72181500  | -1.65222200 | -0.31070700 |
| C | 6.48845500  | -2.76370300 | -0.35328400 |
| C | 7.90254300  | -2.81542900 | -0.83671100 |
| C | -1.14282600 | -0.42601100 | -0.99080800 |
| C | -2.02047700 | -1.52865300 | -0.60115900 |
| O | -0.43958800 | -0.51190800 | -2.02389900 |
| O | -0.26241000 | 4.15386900  | 1.77327300  |
| C | -1.78548900 | 2.94767400  | -1.28313600 |
| C | -2.17230600 | 3.22507700  | -2.53467700 |
| C | 0.91930700  | 4.18531700  | -0.80280500 |
| C | -2.84716000 | -1.49235100 | 0.55105100  |
| C | -3.67257500 | -2.53760500 | 0.92964000  |
| C | -3.67528900 | -3.69083700 | 0.10398900  |
| C | -2.88543600 | -3.77771700 | -1.03983600 |
| C | -2.05713000 | -2.71054700 | -1.39877100 |
| C | -4.54147800 | -2.47728100 | 2.16069600  |
| O | -4.49200800 | -4.70824200 | 0.48884900  |
| O | -1.30657500 | -2.84129800 | -2.51028800 |
| C | -3.36693300 | 4.05551300  | -2.90774200 |
| H | -0.27379800 | -0.34282100 | 1.58158000  |
| H | -2.02107100 | 1.01692500  | 0.31702300  |
| H | -0.12470200 | 1.75348500  | -1.85759700 |
| H | 0.49651200  | 2.52021900  | 3.95259300  |
| H | 0.50010700  | 0.74522900  | 3.81952200  |
| H | 1.74691100  | 1.70708400  | 2.99569200  |
| H | -1.77687000 | 2.57386900  | 2.98150500  |
| H | 2.32141400  | -2.27906100 | 1.37848700  |
| H | 3.96423700  | 0.40386800  | -0.17496300 |
| H | 3.97823000  | -2.61921800 | 0.48955200  |
| H | 6.13365600  | -0.70109900 | -0.64720000 |
| H | 6.05740300  | -3.70598900 | -0.01252900 |
| H | 8.26030600  | -1.83315600 | -1.15813700 |
| H | 8.56853400  | -3.18917500 | -0.04832400 |
| H | 7.99904400  | -3.51446200 | -1.67751200 |
| H | -2.36701600 | 3.34519800  | -0.44883700 |
| H | -1.58710400 | 2.82293000  | -3.36352700 |

|   |             |             |             |
|---|-------------|-------------|-------------|
| H | 1.75817900  | 4.65305200  | -0.28171200 |
| H | 1.21935300  | 4.00776400  | -1.83873900 |
| H | 0.07780600  | 4.87990100  | -0.79796300 |
| H | -2.83995300 | -0.60859900 | 1.17942600  |
| H | -2.89967600 | -4.66651200 | -1.66364400 |
| H | -4.41322800 | -1.52133600 | 2.67453000  |
| H | -5.60187500 | -2.59120100 | 1.90873300  |
| H | -4.29431400 | -3.28002800 | 2.86451900  |
| H | -4.42690400 | -5.45153300 | -0.12894800 |
| H | -0.79546600 | -1.98743800 | -2.59377200 |
| H | -3.89660800 | 4.42217300  | -2.02291400 |
| H | -3.06842400 | 4.92039100  | -3.51356100 |
| H | -4.07279800 | 3.47657400  | -3.51649900 |

Conformation 3 of compound **5** (Boltzmann distribution: 0.037)

| Atom | x           | y           | z           |
|------|-------------|-------------|-------------|
| C    | 1.38512200  | 0.56746900  | 0.51772100  |
| C    | 1.75675200  | 1.84958200  | -0.07091700 |
| C    | -0.03102100 | 0.55907900  | 1.05671100  |
| C    | -0.19469400 | 1.70962700  | 2.08012200  |
| C    | 0.05171600  | 3.02767500  | 1.31563600  |
| C    | 0.56978600  | 2.85512200  | -0.10685400 |
| C    | -1.03406100 | 0.82913200  | -0.11908300 |
| C    | -0.58136400 | 2.09138000  | -0.91205800 |
| C    | 0.76330500  | 1.59663400  | 3.27447800  |
| O    | -1.54962400 | 1.69379000  | 2.54503600  |
| O    | 2.85496800  | 2.17108100  | -0.53622400 |
| C    | 2.19591600  | -0.54764800 | 0.56855600  |
| O    | 1.67108600  | -1.63414800 | 1.19418400  |
| C    | 3.52858600  | -0.62884600 | 0.00545600  |
| C    | 4.39619400  | -1.65945100 | 0.18654700  |
| C    | 5.71259900  | -1.70948800 | -0.41004100 |
| C    | 6.57593700  | -2.73006600 | -0.21534900 |
| C    | 7.94444000  | -2.82425700 | -0.81076700 |
| C    | -1.17234500 | -0.40641600 | -1.00171800 |
| C    | -2.06775300 | -1.49693200 | -0.61534900 |
| O    | -0.48377900 | -0.49307600 | -2.04393600 |
| O    | -0.21155600 | 4.10598400  | 1.82535500  |
| C    | -1.75452800 | 2.97478400  | -1.24712400 |
| C    | -2.14462000 | 3.27258700  | -2.49292700 |
| C    | 0.96255300  | 4.17585600  | -0.75544100 |
| C    | -2.88322400 | -1.45382000 | 0.54205200  |
| C    | -3.72633000 | -2.48715600 | 0.91990900  |
| C    | -3.75429100 | -3.63560900 | 0.08690600  |

|   |             |             |             |
|---|-------------|-------------|-------------|
| C | -2.97429200 | -3.72741200 | -1.06290100 |
| C | -2.13291900 | -2.67330500 | -1.42198900 |
| C | -4.58602200 | -2.40459900 | 2.15898800  |
| O | -4.54648500 | -4.70555300 | 0.36849700  |
| O | -1.39406500 | -2.80706900 | -2.54155100 |
| C | -3.33103500 | 4.12206700  | -2.84888700 |
| H | -0.25810800 | -0.38508100 | 1.55175800  |
| H | -2.00158200 | 1.03450200  | 0.34102800  |
| H | -0.11202600 | 1.76667100  | -1.84514000 |
| H | 0.58396500  | 2.42505500  | 3.96627600  |
| H | 0.57657600  | 0.65321200  | 3.79613500  |
| H | 1.81227400  | 1.62648500  | 2.96926900  |
| H | -1.70784400 | 2.51914800  | 3.02933600  |
| H | 2.22891700  | -2.41453200 | 1.06789100  |
| H | 3.82704600  | 0.22699100  | -0.58723000 |
| H | 4.14232800  | -2.50979000 | 0.82121800  |
| H | 6.00283300  | -0.87293600 | -1.04521400 |
| H | 6.26621500  | -3.55831100 | 0.42329900  |
| H | 8.17783200  | -1.95805200 | -1.43645200 |
| H | 8.70514800  | -2.90100800 | -0.02316600 |
| H | 8.04063600  | -3.73176500 | -1.42065400 |
| H | -2.32647000 | 3.36889600  | -0.40461600 |
| H | -1.56890500 | 2.87382100  | -3.32999400 |
| H | 1.80862200  | 4.62590700  | -0.23048000 |
| H | 1.25512600  | 4.01501900  | -1.79630600 |
| H | 0.12758900  | 4.87794700  | -0.73310200 |
| H | -2.85511100 | -0.57504600 | 1.17667200  |
| H | -3.01817100 | -4.61726600 | -1.68114300 |
| H | -4.41546300 | -1.45920300 | 2.67903800  |
| H | -5.65673800 | -2.45573300 | 1.92256500  |
| H | -4.36342000 | -3.20943700 | 2.87135000  |
| H | -5.04729100 | -4.56202400 | 1.18449000  |
| H | -0.87081100 | -1.96152100 | -2.62477100 |
| H | -3.85167300 | 4.48362400  | -1.95663400 |
| H | -3.02533000 | 4.99100000  | -3.44522700 |
| H | -4.04696500 | 3.55942100  | -3.46115700 |

## Reference

1. Abe, N.; Murata, T.; Hirota, A., Novel oxidized sorbicillin dimers with 1,1-diphenyl-2-picrylhydrazyl-radical scavenging activity from a fungus. *Biosci. Biotechnol. Biochem.* **1998**, 62, 2120-2126.
2. Kahlert, L.; Bassiony, E. F.; Cox, R. J.; Skellam, E. J., Diels–Alder Reactions During the Biosynthesis of Sorbicillinoids. *Angew. Chem. Int. Edit.* **2020**, 59, 5816-5822.
3. Ren, S.; Zeng, Y.; Wang, Q.; Lin, Q.; Yin, X.; Chen, S.; Wang, M.; Liu, L.; Gao, Z., Major Facilitator Superfamily Transporter Participates in the Formation of Dimeric Sorbicillinoids Pigments. *J.Agric.Food Chem.* **2023**, 71,

12216-12224.
